# Supplementary material for: Validation of the automatic image analyser to assess retinal vessel calibre (ALTAIR): a prospective study protocol
Source: PubMed Central journal article supplement — BMJ Open. 2014 Dec 2;4(12):e006144. doi: 10.1136/bmjopen-2014-006144 (PMC4256642; doi:10.1136/bmjopen-2014-006144), 2014-12-02
Supplement: bmjopen-2014-006144.reviewer_comments.pdf [file bmjopen-2014-006144.reviewer_comments.pdf]

# BMJ Open

## Validation of the Automatic image analyzer to assess retinal vessel caliber (ALTAIR).Prospective study protocol.

|                                 |                                                                                                                                                                                                                                                                                                                                                                                                                                                                                                                                                                                                                                                                                                                                                                                                                                                                                                                                                                                                                                                                                                                                                                                                                                                                                                                                                                                                                                                                                                                                                                                                                                                                                                                                                                         |
|---------------------------------|-------------------------------------------------------------------------------------------------------------------------------------------------------------------------------------------------------------------------------------------------------------------------------------------------------------------------------------------------------------------------------------------------------------------------------------------------------------------------------------------------------------------------------------------------------------------------------------------------------------------------------------------------------------------------------------------------------------------------------------------------------------------------------------------------------------------------------------------------------------------------------------------------------------------------------------------------------------------------------------------------------------------------------------------------------------------------------------------------------------------------------------------------------------------------------------------------------------------------------------------------------------------------------------------------------------------------------------------------------------------------------------------------------------------------------------------------------------------------------------------------------------------------------------------------------------------------------------------------------------------------------------------------------------------------------------------------------------------------------------------------------------------------|
| Journal:                        | <i>BMJ Open</i>                                                                                                                                                                                                                                                                                                                                                                                                                                                                                                                                                                                                                                                                                                                                                                                                                                                                                                                                                                                                                                                                                                                                                                                                                                                                                                                                                                                                                                                                                                                                                                                                                                                                                                                                                         |
| Manuscript ID:                  | bmjopen-2014-006144                                                                                                                                                                                                                                                                                                                                                                                                                                                                                                                                                                                                                                                                                                                                                                                                                                                                                                                                                                                                                                                                                                                                                                                                                                                                                                                                                                                                                                                                                                                                                                                                                                                                                                                                                     |
| Article Type:                   | Protocol                                                                                                                                                                                                                                                                                                                                                                                                                                                                                                                                                                                                                                                                                                                                                                                                                                                                                                                                                                                                                                                                                                                                                                                                                                                                                                                                                                                                                                                                                                                                                                                                                                                                                                                                                                |
| Date Submitted by the Author:   | 17-Jul-2014                                                                                                                                                                                                                                                                                                                                                                                                                                                                                                                                                                                                                                                                                                                                                                                                                                                                                                                                                                                                                                                                                                                                                                                                                                                                                                                                                                                                                                                                                                                                                                                                                                                                                                                                                             |
| Complete List of Authors:       | <p>GarciaOrtiz, Luis; La Alamedilla health centre. University of Salamanca, Primary care research unit La Alamedilla</p> <p>Gomez-Marcos, Manuel; Salamanca Institute for Biomedical Research. (IBSAL)., Primary care research unit La Alamedilla, Castilla and León Health Service (SACYL). Network of Preventive Activities and Health Promotion in Primary Care (REDIAPP)</p> <p>Recio-Rodriguez, Jose; Salamanca Institute for Biomedical Research. (IBSAL)., Primary care research unit La Alamedilla, Castilla and León Health Service (SACYL). Network of Preventive Activities and Health Promotion in Primary Care (REDIAPP)</p> <p>Maderuelo-Fernandez, Jose; Salamanca Institute for Biomedical Research. (IBSAL)., Primary care research unit La Alamedilla, Castilla and León Health Service (SACYL). Network of Preventive Activities and Health Promotion in Primary Care (REDIAPP)</p> <p>Chamoso-Santos, Pablo; University of Salamanca. Salamanca Institute for Biomedical Research. (IBSAL), BISITE Research group. Computers and Automation Department</p> <p>Rodriguez-Gonzalez, Sara; University of Salamanca. Salamanca Institute for Biomedical Research. (IBSAL), BISITE Research group. Computers and Automation Department</p> <p>de Paz-Pastrana, Juan; University of Salamanca. Salamanca Institute for Biomedical Research. (IBSAL), BISITE Research group. Computers and Automation Department</p> <p>Merchan-Cifuentes, Miguel; University of Salamanca. Salamanca Institute for Biomedical Research. (IBSAL)., Castilla and León Neuroscience Institute</p> <p>Corchado-Rodriguez, Juan; University of Salamanca. Salamanca Institute for Biomedical Research. (IBSAL), BISITE Research group. Computers and Automation Department</p> |
| <b>Primary Subject Heading</b>: | Ophthalmology                                                                                                                                                                                                                                                                                                                                                                                                                                                                                                                                                                                                                                                                                                                                                                                                                                                                                                                                                                                                                                                                                                                                                                                                                                                                                                                                                                                                                                                                                                                                                                                                                                                                                                                                                           |
| Secondary Subject Heading:      | Cardiovascular medicine, Ophthalmology                                                                                                                                                                                                                                                                                                                                                                                                                                                                                                                                                                                                                                                                                                                                                                                                                                                                                                                                                                                                                                                                                                                                                                                                                                                                                                                                                                                                                                                                                                                                                                                                                                                                                                                                  |
| Keywords:                       | VASCULAR MEDICINE, Medical retina < OPTHALMOLOGY, PRIMARY CARE                                                                                                                                                                                                                                                                                                                                                                                                                                                                                                                                                                                                                                                                                                                                                                                                                                                                                                                                                                                                                                                                                                                                                                                                                                                                                                                                                                                                                                                                                                                                                                                                                                                                                                          |
|                                 |                                                                                                                                                                                                                                                                                                                                                                                                                                                                                                                                                                                                                                                                                                                                                                                                                                                                                                                                                                                                                                                                                                                                                                                                                                                                                                                                                                                                                                                                                                                                                                                                                                                                                                                                                                         |

SCHOLARONE™  
Manuscripts

1  
2  
3  
4  
5  
6  
7  
8  
9  
10  
11  
12  
13  
14  
15  
16  
17  
18  
19  
20  
21  
22  
23  
24  
25  
26  
27  
28  
29  
30  
31  
32  
33  
34  
35  
36  
37  
38  
39  
40  
41  
42  
43  
44  
45  
46  
47  
48  
49  
50  
51  
52  
53  
54  
55  
56  
57  
58  
59  
60

For peer review only

1  
2  
3 Title: **Validation of the Automatic image analyzer to assess retinal vessel**  
4 **caliber (ALTAIR).Prospective study protocol.**  
5  
6

7 Short title: **Altair study**  
8  
9

10  
11  
12 **Authors**

13  
14 Luis Garcia-Ortiz<sup>1,2</sup>, Manuel A. Gómez-Marcos<sup>1,2</sup>, Jose I. Recio-Rodríguez<sup>1</sup>, Jose A Maderuelo  
15  
16 Fernandez<sup>1</sup>, Pablo Chamoso-Santos<sup>3</sup>, Sara Rodríguez-González<sup>3</sup>, Juan F de Paz-Santana<sup>3</sup>, Miguel A  
17  
18 Merchan-Cifuentes<sup>4</sup>and Juan M Corchado-Rodríguez<sup>3</sup> on behalf of ALTAIR group.  
19  
20

- 21  
22  
23 1. Primary care research unit La Alamedilla, Castilla and León Health Service (SACYL). Network of  
24 Preventive Activities and Health Promotion in Primary Care (REDIAPP). Salamanca  
25 Institute for Biomedical Research. (IBSAL). Salamanca, Spain.  
26  
27 2. Department of Medicine. University of Salamanca.  
28  
29 3. BISITE Research group. Computers and Automation Department. University of Salamanca.  
30 Salamanca Institute for Biomedical Research. (IBSAL). Salamanca, Spain.  
31  
32 4. Castilla and León Neuroscience Institute. University of Salamanca. Salamanca  
33 Institute for Biomedical Research. (IBSAL). Salamanca, Spain.  
34  
35

36 **Corresponding author:**

37 Luis García Ortiz  
38 Unidad de Investigación, Centro de Salud La Alamedilla.  
39 37003 Salamanca. Spain.  
40 Tel:+34 923 290900-53550; fax +34 923 123644  
41 e-mail: Lgarciao@usal.es  
42  
43

44  
45 **E-mail:**

46 LGO: Lgarciao@usal.es  
47 MGM: magomez@usal.es  
48 JIR: donrecio@gmail.com  
49 JAM: jmaderuelo@saludcastillayleon.es  
50 PCS: chamoso@usal.es  
51 SRM: srg@usal.es  
52 JFP: fcofds@usal.es  
53 MMC: merchan@usal.es  
54 JMC: corchado@usal.es  
55  
56  
57  
58  
59  
60

**ABSTRACT**

**Introduction:**The fundus examination is a non-invasive evaluation of the microcirculation of the retina.

The aim of the present study is to develop and validate (reliability and validity) the *Altair* software platform (Automatic image analyser to assess retinal vessel calibre) in order to analyse its utility in different clinical environments.

**Methods and analysis:**A cross-sectional study in the first phase and a prospective observational study in the second with 4-year of follow-up. The study will be performed in a primary care including 386 subjects. The main measurements will include carotid intima-media thickness, pulse wave velocity by Sphygmocor, cardio-ankle vascular index through the VASERA VS-1500®, cardiac evaluation by a digital ECG and renal injury by microalbuminuria and glomerular filtration. The retinal vascular evaluation will be performed using a TOPCON TRCNW200 non-mydratic retinal camera to obtained digital images of the retina, and the developed software (*Altair*) will be used to automatically calculate the caliber of the retinal vessels, the vascularised area, and the branching pattern. For software validation, the intra and inter-observer reliability, the concurrent validity of the vascular structure and function, as well as the association between the estimated retinal parameters and the evolution or onset of new lesions in the target organs or cardiovascular diseases.

**Ethics and dissemination:** The study has been approved by the clinical research ethics committee of the healthcare area of Salamanca. All study participants will sign an informed consent to agree to participate in the study in compliance with the Declaration of Helsinki and the WHO standards for observational studies. Validation of this tool will provide greater reliability to the analysis of retinal vessels by decreasing the intervention of the observer and will result in increased validity through the use of additional information, especially in the areas of vascularisation and vessel branching patterns.

**Trial registration number:** Clinical Trials.gov Identifier: NCT02087605

**Key words:** Retinal vessel. Vascular stiffness. Cardiovascular diseases. Risk Assessment.

### Strengths and limitations of this study

- 1.-A new software to retinal vessels evaluation will be developed, the *Altair* platform.
- 2.-A complete evaluation of retinal vascularization, including an automatically calculate the caliber of the retinal vessels, the vascularised area, and the branching pattern will be performed.
- 3.-The inter and intra-observer reliability in determining the caliber of arterial and venous vessels, the vascularised surface, and branching patterns using the *Altair* software platform will be performed.
- 4.-The concurrent validity of the *Altair* software platform, by analysing the relationship between retinal parameters and other parameters of vascular structure and function will be performed
- 5.-The design of the study during the first phase is transversal; as a result, causality relations cannot be derived, i.e., only the associations among the analysed variables can be performed.

## INTRODUCTION

The fundus examination is a non-invasive evaluation of the retinal microcirculation and of the vascular damage caused by multiple cardiovascular risk factors. Different tools have been developed to evaluate the thickness of the retinal arteries and veins [1-7], yet, all of them require intervention of an observer to some extent. Moreover, the techniques and tools that are currently applied are manual or semiautomatic in nature, for which the observer has an important influence, thus providing limited information.

In population studies, an association has been found between the calibre of the retinal vessels and arterial hypertension [8], left ventricular hypertrophy [9], metabolic syndrome [10], stroke [11], and coronary heart disease [12], especially in women [13]. However, other studies disagree and show contradictory results regarding the evolution of the arteriosclerotic lesion and the calibre of the retinal vessels [14-16]. In this way, Cuspidi et al. [17] and Masaidi et al. [18] failed to detect an association between the calibre of the retinal vessels and target organ injuries (cardiac, vascular, and renal) in studies of two hypertensive populations. However, Torres et al. reported a negative association between carotid intima-media thickness (IMT) and the thickness of the retinal arteries but a positive association with the veins [19].

Recently, our group developed and validated a semiautomatic tool, the arteriovenous index calculator, to evaluate the vascular calibre of the retinal vessels [20] with reduced influence of the observer. This tool showed high reliability when measuring the calibre of the retinal vessels with an intraclass correlation coefficient (ICC) for intra- and inter-observers greater than 0.96 for veins, arteries, and the arteriovenous ratio (AVR). These measures, especially the venous calibre and the AVR, were also shown to be independent variables associated with estimated cardiovascular risk, according to the Framingham scale and the microvascular kidney lesions evaluated according to the level of microalbuminuria. This positive association between the cardiovascular risk and the venous calibre is in line with several published studies showing an association between the AVR and the risk of coronary heart disease [12 13 21]. However, longitudinal studies with a greater number of patients would help to clarify the discrepancies among previously published studies on cardiovascular risk and vascular structure and function. Moreover, it should not be forgotten that these tools provide less information than retinal imaging on the thickness of the arteries and veins, their branching patterns, and the vascularised areas, which may be relevant for

1  
2  
3 evaluating the status of the vascular tree and may be the cause of some of the discrepancies previously  
4 reported.  
5

6  
7 A new and different approach to the study of the vascular systems is the characterisation of the blood  
8 vessel patterns in the normal circulation of the human retina [22]. With this method, the distribution of the  
9 vessel patterns in the normal circulation of the human retina [22]. With this method, the distribution of the  
10 branching of the vascular system in a two-dimensional space can be analysed, and the geometrical  
11 complexity of the branching and the density of the retinal vessels can be quantified [23]. Indeed, the  
12 current scientific literature contains a number of publications on this subject [24-27].  
13

14  
15 In the present study, a novel software platform for image processing of the structural properties of the  
16 vessels is proposed using a human fundus red-free camera. The "Automatic image analyser to assess  
17 retinal vessel calibre" (*Altair*) software platform employs analytical methods and artificial intelligence (AI)  
18 algorithms to detect the retinal parameters of interest. The sequence of the algorithms consists of a new  
19 methodology that can be used to determine the properties of the veins and arteries of the retina; together,  
20 this system unifies all of the methods for automation of the measuring processes of retinal vessels.  
21

22  
23 Therefore, the **general aim** of the present study is the development and validation (reliability and validity)  
24 of the *Altair* software platform in order to analyse its utility in different clinical settings. The following  
25 specific objectives will be studied:  
26

- 27  
28  
29  
30  
31  
32  
33  
34  
35 i) To evaluate inter- and intra-observer reliability in determining the caliber of arterial and venous vessels,  
36 the vascularised surface, and branching patterns using the *Altair* software platform.  
37  
38  
39 ii) To evaluate the concurrent validity of the *Altair* software platform, in different populations, by analysing  
40 the relationship between retinal parameters and other parameters of vascular structure and function,  
41 including carotid IMT, pulse wave velocity (PWV), and the cardio-ankle vascular index (CAVI), as well as  
42 injuries in other target organs and the cardiovascular risk.  
43  
44  
45  
46  
47 iii) To evaluate the evolution of target organ injuries and cardiovascular morbidity and mortality according  
48 to the vascularisation parameters of the retina determined using the *Altair* software platform.  
49  
50  
51  
52  
53  
54  
55  
56  
57  
58  
59  
60

## METHOD AND ANALYSIS

### Study design

The first phase will be a cross-sectional study aimed at validating the developed tool. Subsequently, the second phase will consist of a prospective observational study with annual follow-up evaluations over 4 years. The study will be developed in a primary healthcare setting.

### Subjects

#### *Study population*

The population under study will consist of subjects from 35 to 74 years of age with a cardiovascular risk factor according to the 2013 European Society of Hypertension/European Society of Cardiology Guidelines [28]. Subjects were excluded due to the following criteria: psychic or cognitive disorders that interfere with the established requisites of the protocol; non-collaborative attitude; educational or comprehensive limitations; and severe comorbidities with a 12-month likelihood of life-threatening complications. A consecutive sampling of all patients sent to the research unit for cardiovascular risk evaluation will be performed, and those complying with the inclusion and exclusion criteria will be asked to participate until the estimated sample size is achieved.

#### *Sample size*

The sample size has been set to detect a correlation coefficient among the pulse wave velocity (PWV), the gold standard measure of arterial stiffness, and the retinal parameters of 0.15, with an alpha risk of 0.05 and a beta risk of 0.20 and a 10% estimated loss regarding the difficulty of the technique or dropout on follow-up. As a result, a total of 386 patients will be included in this study. This number of patients will be adequate to detect a difference of 1 m/sec on the PWV among the AVR tertiles, considering a standard deviation (SD) of 2.22 m/sec with an alpha risk of 0.05 and a beta risk of 0.20.

#### *Variables and measurement instruments*

The general and potentially effect-modifying variables, such as age, gender, occupation, smoking, alcohol consumption, personal history and drug use will be documented.

#### *Laboratory determinations*

Venous blood sampling will be performed between 08:00 and 09:00 hours after the individuals fasted and abstained from smoking and the consumption of alcohol and caffeinated beverages for the previous 12



1  
2  
3 hours. Fasting plasma glucose, creatinine, uric acid, serum total cholesterol, HDL-cholesterol and  
4 triglyceride concentrations will be measured using standard enzymatic automated methods. LDL  
5 cholesterol will be estimated by the Friedewald equation when the direct parameter will be not available.  
6  
7 Glycated haemoglobin will be measured with an immune-turbidimetric assay. High sensitive C-reactive  
8 protein levels and fibrinogen concentrations will be determined by immunoturbidimetric assay. Blood  
9 samples will be collected in the health center, and will be analyzed at the University hospital of Salamanca  
10 in external quality assurance programs of the Spanish Society of Clinical Chemistry and Molecular  
11 Pathology.  
12  
13  
14  
15  
16  
17  
18

### 19 ***Anthropometric measurements***

20  
21 Body weight will be determined on two occasions using a homologated electronic scale (Seca 770;  
22 Medical scale and measurement systems, Birmingham, United Kingdom) following due calibration  
23 (precision  $\pm 0.1$  kg), with the patient wearing light clothing and shoeless. These readings will be rounded  
24 to 100 g. Height in turn will be measured with a portable system (Seca 222; Medical scale and  
25 measurement systems, Birmingham, United Kingdom), recording the average of two readings, and with  
26 the patient shoeless in the standing position. The values will be rounded to the closest centimeter. Body  
27 mass index (BMI) will be calculated as weight (kg) divided by height squared ( $m^2$ ). A value of  $> 30$   $kg/m^2$   
28 will be taken to define obesity. Waist circumference will be measured using a flexible graduated measuring  
29 tape with the patient in the standing position without clothing. The upper border of the iliac crests will be  
30 located, and the tape will be wrapped around above this point, parallel to the floor, ensuring that it will be  
31 adjusted without compressing the skin. Adiposity indices, waist-height and waist-hip, will also be  
32 calculated.  
33  
34  
35  
36  
37  
38  
39  
40  
41  
42  
43  
44

### 45 ***Office or clinical blood pressure***

46  
47 Office blood pressure measurement will involve three measurements of systolic blood pressure (SBP) and  
48 diastolic blood pressure (DBP), using the average of the last two, with a validated OMRON model M10-IT  
49 sphygmomanometer (Omron Health Care, Kyoto, Japan), by following the recommendations of the  
50 European Society of Hypertension[29]. Pulse pressure will be estimated with the mean values of the  
51 second and third measurements.  
52  
53  
54  
55  
56  
57  
58  
59  
60

***Pulse wave velocity (PWV) and central (CAIx) and peripheral augmentation index (PAIx)***

These parameters will be estimated using the SphygmoCor System (AtCor Medical Pty Ltd., Head Office, West Ryde, Australia). With the patient sitting and resting his/her arm on a rigid surface, pulse wave analysis will be performed with a sensor in the radial artery, using mathematical transformation to estimate the aortic pulse wave. CAIx will be estimated from aortic wave morphology using the following formula:  $\text{increase in central pressure} \times 100 / \text{pulse pressure}$  and it will be adjusted for heart rate at 75 bpm. PAIx is a measurement taken directly from the late systolic shoulder of the peripheral arterial waveform, and is defined as the ratio of the difference between the 2<sup>nd</sup> peak and diastolic pressure to the difference between the 1<sup>st</sup> peak and diastolic pressure [30], it is age-dependent and could be a useful index of vascular aging [31]. PAIx will be calculated as follows:  $(\text{Second peak systolic blood pressure [SBP2]} - \text{diastolic blood pressure [DBP]}) / (\text{first peak SBP} - \text{DBP}) \times 100 (\%)$  and it will be corrected for heart rate at 75 bpm and it will be reported as PAIx75. Carotid and femoral artery pulse waves will be analyzed, with the patient in a supine position, using the SphygmoCor System (Vx pulse wave velocity), estimating the delay as compared to the ECG wave and calculating PWV. Distance measurements will be taken with a measuring tape from the sternal notch to the carotid and femoral arteries at the sensor location and will be multiplied by 0.8. Subclinical organ damage of PWV will be defined as a carotid–femoral PWV >10 m/s [28 32].

***Assessment of vascular structure by carotid intima media thickness (IMT)***

Carotid ultrasound to assess C-IMT will be performed by two investigators trained for this purpose before starting the study. A Sonosite Micromax ultrasound device paired with a 5–10 MHz multi-frequency high-resolution linear transducer with Sonocal software will be used for performing automatic measurements of carotid IMT in order to optimize reproducibility. Measurements will be made of the common carotid after the examination of a 10 mm longitudinal section at a distance of 1 cm from the bifurcation, performing measurements in the proximal and in the distal wall in the lateral, anterior and posterior projections, following an axis perpendicular to the artery to discriminate two lines, one for the intima-blood interface and the other for the media-adventitious interface. A total of 6 measurements will be obtained of the right carotid and other 6 of the left carotid, using average values (average carotid IMT) and maximum values (maximum carotid IMT) automatically calculated by the software [33]. The measurements will be obtained

1  
2  
3 with the subject lying down, with the head extended and slightly turned opposite to the examined carotid  
4 artery. The reliability was evaluated before the study began using the intraclass correlation coefficient,  
5 which showed values of 0.974 (95%CI: 0.935 to 0.990) for intra-observer agreement on repeated  
6 measurements in 20 subjects, and 0.897 (95%CI:0.740 to 0.959) for inter-observer agreement. According  
7 to the Bland-Altman analysis, the mean difference for intraobserver agreement (95% limits of agreement)  
8 was 0.022 (95%CI: -0.053 to 0.098) and intra-observer agreement was 0.012 (95%CI: -0.034 to 0.059).  
9 The average IMT will be considered abnormal if it measured > 0.90 mm, or if there will be atherosclerotic  
10 plaques with a diameter of 1.5 mm or a focal increase of 0.5 mm or 50% of the adjacent IMT [28].  
11  
12  
13  
14  
15  
16  
17  
18

### 19 **Cardio Ankle Vascular Index and Ankle-brachial index**

20 Cardio Ankle Vascular Index (CAVI) and Ankle-brachial index (ABI) will be measured using Vasera device  
21 VS-1500® (Fukuda Denshi). The pulse wave velocity (PWV) will be calculated, as well as Cardio Ankle  
22 Vascular Index (CAVI), which gives a more accurate calculation of the atherosclerosis degree. CAVI  
23 integrates cardiovascular elasticity derived from the aorta to the ankle pulse velocity through an  
24 oscillometric method and it is used as a good measure of vascular stiffness and it doesn't depend on  
25 blood pressure [34]. CAVI values will be automatically calculated by substituting the stiffness parameter  $\beta$   
26 in the following equation to detect the vascular elasticity and the cardio-ankle PWV: Stiffness parameter  $\beta$   
27 =  $2\rho \times 1 / (P_s - P_d) \times \ln (P_s/P_d) \times PWV^2$ , where  $\rho$  is the blood density,  $P_s$  and  $P_d$  are SBP and DBP in  
28 mmHg, and the PWV is measured between the aortic valve and ankle. The average coefficient of the  
29 variation of the CAVI is less than 5%, which is small enough for clinical use and confirm that CAVI has  
30 favorable reproducibility [35]. Cardio Ankle Vascular Index and Ankle-brachial index will be measured at  
31 rest. For the study, the lowest ABI and the highest CAVI and PWV obtained will be considered.  
32  
33  
34  
35  
36  
37  
38  
39  
40  
41  
42  
43  
44

### 45 **Renal assessment**

46 Kidney damage will be assessed by measuring estimated glomerular filtration rate using the CKD-EPI  
47 (Chronic Kidney Disease Epidemiology Collaboration) [36] equation and proteinuria, as assessed by the  
48 albumin/creatinine ratio following the criteria of the 2013 European Society of Hypertension/European  
49 Society of Cardiology Guidelines [28] Subclinical organ damage will be defined as a glomerular filtration  
50 rate below 30–60 ml/min/1.73 m<sup>2</sup> or microalbuminuria (30–300 mg/24 h), or albumin–creatinine ratio (30–  
51 300 mg/g; 3.4–34 mg/mmol) (preferably on morning spot urine). Renal disease will be defined as a  
52  
53  
54  
55  
56  
57  
58  
59  
60

glomerular filtration rate  $<30$  mL/min/1.73 m<sup>2</sup> (BSA), proteinuria ( $>300$  mg/24 h), or albumin/creatinine ratio  $> 300$  mg/24 h [28].

### **Cardiac assessment**

Electrocardiographic examination will be performed using a General Electric MAC 3.500 ECG System (Niskayuna, New York, USA) that automatically measures wave voltage and duration and estimates the criteria of the Cornell voltage-duration product (Cornell VDP) [37]. Electrocardiographic LVH will be defined as a Sokolow–Lyon index  $>3.5$  mV; RaVL  $>1.1$  mV, Cornell voltage duration product  $>244$  mV\*ms or RaVL  $>1.1$  mV; [28].

### **Cardiovascular risk assessment**

Cardiovascular risk will be estimated using the score of the 2013 European Society of Hypertension/European Society of Cardiology Guidelines[28] and the risk equation (D'Agostino scale) based on the Framingham study [38]. Risk factors used include age, sex, total cholesterol, high-density lipoprotein cholesterol (HDL-C), and systolic blood pressure as quantitative variables, and drug treatment for hypertension, smoking, and history of diabetes mellitus as dichotomous variables.

### **Retinal vascular evaluation**

Using a non-mydratic retinography, TOPCON TRC NW 200, (Topcon Europe B.C., Capelle a/d Ijssel, The Netherlands) in the sitting position, a nurse trained will get nasal and temporal images centered in papilla. Then using the specific software developed (*Altair*) will be automatically calculated the retinal vessels thickness, the AVR, the area vascularized and the pattern of branching.

### **Development of *Altair* platform: Automatic image analyzer to assess retinal vessel caliber**

The platform, called Altair "Automatic image analyzer to assess retinal vessel caliber", makes use of a methodology divided in different stages that are described below, to determine the characteristics of interest of the veins and arteries of the retina. This methodology uses artificial Intelligence (AI) techniques and analytical algorithms to discover retinal parameters of interest.

The methodology is separated into two phases: (i) Digitization of the retina, in which the different measures of the eye image are recognized. Here a data structure is created, which makes it possible to represent and process the retina. This phase is subdivided into the following steps as discussed below: load image and eye detection, processing, detection and segmentation. (ii) Measurements, in which we

work with retinas that have been previously identified. This phase includes extraction of knowledge and manual correction, or expert knowledge, if necessary.

**Digitization of the retina:** To perform this phase, the following steps are necessary:

1. Load image and eye detection: The platform will automatically try to determine which eye (left or right) is the image, based on the detection of the macula. In this step, if the automatic detection has been wrong, the supervisor can modify this value by simply clicking on the correct eye.
2. Processing: In this step, then noise is reduced, the contrast is improved, the blurriness corrected and the edges are sharpened. Some of these actions can be carried out at the hardware level, which is to say with the features included with the camera. During the testing, retinography will be performed using a Topcon TRC NW 200 nonmydriatic retinal camera, obtaining nasal and temporal images centered on the disk.
3. Detection limits: In this step, the platform is capable of locating the disk and identifying the center and edges of the retina (figure 1). The identification of the papilla is vital since it helps as the starting point for the detection and identification of the different blood vessels. The platform builds a data structure that identifies each part of the retina based on the matrices of colors representing the images obtained. In this step, image processing techniques [24 26] will be used to detect intensity based on the boundaries of the structures.
4. Segmentation: In order to detect the limits, it became necessary to carry out a process of image segmentation. Segmentation is the process that divides an image into regions or objects whose pixels have similar attributes. Each segmented region typically has a physical significance within the image. It is one of the most important processes in an automated vision system because it makes it possible to extract the objects from the image for subsequent description and recognition [39-41]. This step can be considered the heart of the methodology proposed and used in the platform and perform the following actions:
  - a. Identification of vessels. Blood vessels are identified in the image by thresholding techniques. Their purpose is to remove pixels where the structuring element does not enter, in this case the blood vessels. The platform offers here a number of useful options for experts: Threshold vessels, in order to modify the threshold level automatically taken to a

1  
2  
3 new vessel detection. Recalculate vessels, recalculate the vessels taking as the threshold  
4 established with the previous parameter. Pencil/eraser thickness: Sets thickness to draw or  
5 erase lines / vessels to switch vessels. Connect: Selecting this option and interacting on the  
6 overall image of the retina, the application connects those vessels whose structure has been  
7 divided as they were not detected section.  
8

- 9  
10  
11  
12  
13 b. Structure of vessel. At the end of this stage the entire arterio-venous tree is stored in a  
14 structured way, making it possible to know not only if a vessel passes through a point or not,  
15 but through which point each vessel passes, which one is its parent, etc.  
16  
17  
18 c. Cataloging of veins and arteries (Figure 2). In this step the platform detects whether a vessel  
19 is vein or artery, main branch is taken of the vessel. In this step different classifiers based on  
20 IA as decision trees and Bayesian networks [42] are applied.  
21  
22  
23  
24

### 25 **Measurements**

26  
27 In this second phase, the results obtained are presented. The platform can display the following  
28 measures: thickness of the veins in  $\mu\text{m}$ , artery thickness in  $\mu\text{m}$ , AVR (ratio between the thickness of the  
29 arteries and veins thickness), veins area in square  $\mu\text{m}$ , artery area in square  $\mu\text{m}$ , area of all vessels in  
30 square  $\mu\text{m}$ , radio papilla in millimeters.  
31  
32  
33

34  
35 The platform also generates internally combined parameters by quadrants and circles. These values are  
36 visible when it comes to export CSV files either individually or together with other existing images already  
37 processed database values.  
38  
39

40  
41 Results of its validity analysis must be consistent with the findings from researches focused on both  
42 cardiovascular risk estimation and evaluation of target organ damage. The results obtained during the use  
43 of the platform will be connected and used to extract additional information by using reasoning models  
44 such as case-based reasoning (CBR) [43] [44].  
45  
46  
47

48  
49 As conclusion, the platform is robust to the changes in the appearance of retinal fundus images typically  
50 encountered in clinical environments, and is proposed as a unified platform to connect all the methods  
51 needed to automate all processes of measurement on the retinas.  
52  
53  
54  
55  
56  
57  
58  
59  
60

### Retinal software validation

To validate the retinal software platform, the following steps will be completed by the evaluators after previous training in imaging appreciation. 1. Intra-observer variability: To evaluate the measurement repeatability, the operator must measure the same image of an individual on at least two occasions. To this end, an operator will measure 100 images of a random subsample of 50 patients with a 1-week difference between the two measurements. In this case, the operator and the analysed images will be the same on both days, and the information from the previous measurement will be unknown. 2. Inter-observer variability: To evaluate the reproducibility of the measurement system, a different operator than who completed the assessment in phase 1 will evaluate the same 100 images previously analysed. The information from the results obtained in the previous phase will be unknown to this operator, and both operators will have the same experience in the subject and pertaining to the use of the software. Furthermore, both operators will receive the same preparatory training. 3. With the developed retinal software, the program will provide results on the AVR and the vein and artery thickness. To assess the degree of agreement between these methods, i.e., the AVR and *Altair*, the evaluation of 100 images will be performed using both tools. In this way, we will be able to demonstrate that the new method, apart from providing the same results, is more objective and faster in elaborating the results. 4. The measurement validity will be analysed in a total sample of 386 subjects and 772 retinographies, in regards to the relationship between the results of the carotid IMT, as a measurement of vascular structure, the PWV, the gold standard measure of arterial stiffness (arterial stiffness), the CAVI, kidney function, electrocardiographic parameters, and the estimated cardiovascular risk using different scales. 5. The association between different estimated parameters of the retina with the evolution or onset of new lesions in the target organs will be analysed, as well as any cardiovascular events that occur during the 4-year follow-up of the second phase of this project.

### Statistical analysis

The data corresponding to quantitative variables with a normal distribution will be presented with the mean and standard deviation and with the median and an interquartile range if the distribution is asymmetric, while the qualitative variables will be presented according to the distribution of the frequencies. Normality will be evaluated with the Kolmogorov–Smirnov test. The Pearson's Chi-squared test will be used to

1  
2  
3 analyse associations between the qualitative variables. The mean comparison, in the case of two groups,  
4 will be performed using the Student's t-test for independent samples and, in the case of larger groups, the  
5 ANOVA test. Post-hoc contrasts will be performed with the least significant difference (LSD) method and  
6 an alpha value <0.05. Repeated data will be analysed with the Student's t-test for paired data. The  
7 relationship between quantitative variables will be analysed according to the Pearson's or Spearman's  
8 correlation coefficient, depending on the type of distribution being considered. Finally, a multivariate  
9 analysis with multiple lineal regressions will be performed to analyse the association of the retinal  
10 parameters generated by *Altair* with the vascular structure and function. To contrast the hypothesis, an  
11 alpha risk of 0.05 will be set as the limit of statistical significance. Statistical analysis will be performed  
12 using SPSS/PC+ software version 20.0.

13  
14 For validation of the retinal software, we will evaluate the measurements of artery and vein thickness,  
15 vascularised surfaces, and branching patterns from the three phases of validation, and the intraclass  
16 correlation coefficient (ICC) will be calculated as a comparative method. Using the Bland-Altman method,  
17 the limits of agreement between the measurements of the observers will be evaluated. The kappa  
18 agreement coefficient will be analysed to categorise the variable. This coefficient will allow us to evaluate  
19 the degree of agreement between the two methods. The accordance validity will also be analysed via  
20 correlation and multiple regression analysis, by evaluating the degree of association with other parameters  
21 of vascular structure and function and target organ injury.

### 22 23 24 25 26 27 28 29 30 31 32 33 34 35 36 37 38 39 **Project schedule**

40  
41 This project is on a 5-year plan, with the aim of developing and validating the *Altair* software platform  
42 during the first year. Subsequently, a 4-year follow-up study will be performed to evaluate the evolution of  
43 target organ injuries, as well as the cardiovascular risk on the analysed retinal vascularisation parameters,  
44 i.e., the artery and vein thickness, the vascularised surface, and the branching patterns. An exhaustive  
45 evaluation of the subject will be performed at baseline and during the third and fifth years. A short  
46 evaluation will be performed during the second and fourth years.

### 47 48 49 50 51 52 53 **Quality control**

54  
55 In order to ensure data quality, the professionals in charge of assessment retinal images and data  
56 collection will receive specific training. Regular external monitoring will then be performed to verify  
57  
58  
59  
60



1  
2  
3 adequate application of methods, both in performing the different examinations and collecting the  
4  
5 information.

### 6 7 **Ethical and legal issues**

8  
9 The study has been approved by the clinical research ethics committee (CEIC) of the healthcare area of  
10  
11 Salamanca ("CEIC of Area de Salud de Salamanca", 29 January, 2014). Subjects will be required to sign  
12  
13 the informed consent prior to inclusion in the study, in accordance with the Declaration of Helsinki [45].  
14  
15 Subjects will be informed of the objectives of the project and of the risks and benefits of the examinations  
16  
17 made. None of the examinations pose life-threatening risks for the type of subjects to be included in the  
18  
19 study. The study includes the obtainment of biological samples; the study subjects therefore will be  
20  
21 informed in detail. The confidentiality of the recruited subjects will be ensured at all times in accordance  
22  
23 with the provisions of current legislation on personal data protection (15/1999 of 13 December, LOPD),  
24  
25 and the conditions contemplated by Act 14/2007 on biomedical research.  
26

### 27 28 **Discussion**

29  
30 In a previous study performed by our group [20], we identified a positive association between the  
31  
32 cardiovascular risk, estimated with the Framingham scale, and the retinal vessel calibre, mainly the  
33  
34 venous calibre, and this association was maintained in the multivariate analysis. The arterial calibre, which  
35  
36 also demonstrated a positive association, and the AVR, which demonstrated a negative association, seem  
37  
38 to play a less relevant role than the venous calibre in regards to the cardiovascular risk.

39  
40 The positive association between the cardiovascular risk and the venous calibre is in accordance with  
41  
42 several published studies showing an association between the AVR and the coronary heart disease risk  
43  
44 [12 13 21]. For example, McGeecham et al. [21], showed that when including the arterial and venous  
45  
46 thickness, the Framingham model improved coronary event prediction, but only in women. This finding  
47  
48 was repeated in several studies and was recently reported in a meta-analysis [13], which seems to  
49  
50 support the notion that microvascular disease could be more important than coronary heart disease in  
51  
52 women than men [46]. However, these results have been variable, as Wong et al. in the Beaver Dam Eye  
53  
54 study [47] described the lack of an association between the AVR and the cardiovascular morbidity and  
55  
56 mortality in the examined subgroups. In addition, Wang JJ et al.[48] identified an association between  
57  
58 venous calibre and coronary death in men but not in women.  
59  
60

1  
2  
3 It is likely that some of these discrepancies are due to the different tools employed for evaluation of the  
4 retinal vessels, as all of these methods are manual or semiautomatic and, to a greater or lesser degree,  
5 are susceptible to the influence of the observer. The use of only particular information regarding the  
6 vascularisation of the retina may also influence the results. However, the *Altair* software platform resolves  
7 these problems. On the one hand, this platform is practically an automated tool with a low observer  
8 influence. In addition, we expect the inter- and intra-observer variability to be low and, as a result, the  
9 reliability to be significantly elevated. On the other hand, by using additional information on retinal  
10 vascularisation, the vascularised surface, the vascularisation patterns, and the artery and vein thickness,  
11 we expect to improve the validity of the tool and clarify the discrepancies reported in previous studies.  
12  
13  
14  
15  
16  
17  
18  
19  
20

### 21 **Study limitations**

22  
23 Data will be obtained from patients with a cardiovascular risk factor, who satisfy the inclusion criteria, and  
24 who were referred by a family physician to the Research Unit for vascular risk assessment. Thus, this  
25 approach uses a consecutive sampling method with inclusion criteria, i.e., a non-randomised sampling  
26 method. However, the size of the sample may buffer this limitation, and the real clinical conditions may  
27 lead us to a more real situation than that using more restrictive inclusion criteria for the study patients. The  
28 design of the study during the first phase is transversal; as a result, causality relations cannot be derived,  
29 i.e., only the associations among the analysed variables can be performed. Therefore, non-statistically  
30 detected associations between variables may be possible due to the sample size.  
31  
32  
33  
34  
35  
36  
37  
38  
39  
40  
41  
42  
43  
44  
45  
46  
47  
48  
49  
50  
51  
52  
53  
54  
55  
56  
57  
58  
59  
60

**Abbreviations**

ALTAIR: Automatic image analyzer to assess retinal vessel caliber; ABI: Ankle-brachial index; Alx: Augmentation Index; BMI: Body mass index; CAVI: Cardio Ankle Vascular index; CKD-EPI: Chronic Kidney Disease Epidemiology Collaboration; DBP: Diastolic blood pressure; ESH: European Society of Hypertension; IMT: Intima-media thickness; PWV: Pulse Wave Velocity; SBP: Systolic blood pressure.

**Contributors** Conception of the idea for the study: L. Garcia-Ortiz and JM Corchado-Rodríguez. Development of the protocol, organization and funding: L. García-Ortiz, JM. Corchado-Rodríguez, J.I. Recio-Rodríguez, M.Á. Gómez-Marcos, JA Maderuelo, S. Rodríguez-González, JF. de Paz-Santana, and P. Chamoso-Santos. Writing of the manuscript: L. Garcia-Ortiz, JM Corchado-Rodríguez and MA. Gómez-Marcos. All the authors have read the draft critically, to make contributions, and approved the final text.

**Collaborators.** *Members of the Altair group:* Luis García-Ortiz, José I Recio-Rodríguez, Manuel A Gómez-Marcos, José A Maderuelo-Fernández, Sara Rodríguez-González, Juan F de Paz-Santana, Pablo Chamoso-Santos, Miguel Merchan-Cifuentes and Juan M Corchado-Rodríguez. María C Patino-Alonso, Emiliano Rodríguez-Sánchez, Diana Perez Arechaederra, Sara Mora Simón, Ángela de Cabo Laso, Carmela Rodriguez Martín, Luis F Valero Juan, Leticia Gómez-Sánchez, Cristina Agudo-Conde.

**Funding:** This project was financed by the Carlos III Health Institute of the Ministry of Health of Spain (RETICS RD12/0005/0004), the Autonomous Government of Castilla y León (GRS /B/14) and Vicente y Garcia Corselas Fundation (Call 2013).

**Competing interests** None

**Patient consent** Obtained.

**Ethics approval** The study has been approved by the clinical research ethics committee of the healthcare area of Salamanca.

**Provenance and peer review** Not commissioned; peer reviewed for ethical and funding approval prior to submission.

## REFERENCES

1. Hubbard LD, Brothers RJ, King WN, *et al.* Methods for evaluation of retinal microvascular abnormalities associated with hypertension/sclerosis in the Atherosclerosis Risk in Communities Study. *Ophthalmology* 1999;106:2269-80.
2. Ikram MK, de Jong FJ, Vingerling JR, *et al.* Are retinal arteriolar or venular diameters associated with markers for cardiovascular disorders? The Rotterdam Study. *Invest Ophthalmol Vis Sci* 2004;45:2129-34.
3. Nguyen TT, Wang JJ, Sharrett AR, *et al.* Relationship of retinal vascular caliber with diabetes and retinopathy: the Multi-Ethnic Study of Atherosclerosis (MESA). *Diabetes Care* 2008;31:544-9.
4. Pose-Reino A, Gomez-Ulla F, Hayik B, *et al.* Computerized measurement of retinal blood vessel calibre: description, validation and use to determine the influence of ageing and hypertension. *J Hypertens* 2005;23:843-50.
5. Tikellis G, Wang JJ, Tapp R, *et al.* The relationship of retinal vascular calibre to diabetes and retinopathy: the Australian Diabetes, Obesity and Lifestyle (AusDiab) study. *Diabetologia* 2007;50:2263-71.
6. Cheung CY, Ikram MK, Sabanayagam C, *et al.* Retinal microvasculature as a model to study the manifestations of hypertension. *Hypertension* 2012;60:1094-103.
7. Ortega M, Barreira N, Novo J, *et al.* Sirius: a web-based system for retinal image analysis. *Int J Med Inform* 2010;79:722-32.
8. Tanabe Y, Kawasaki R, Wang JJ, *et al.* Retinal arteriolar narrowing predicts 5-year risk of hypertension in Japanese people: the Funagata study. *Microcirculation* 2010;17:94-102.
9. Tikellis G, Arnett DK, Skelton TN, *et al.* Retinal arteriolar narrowing and left ventricular hypertrophy in African Americans. the Atherosclerosis Risk in Communities (ARIC) study. *Am J Hypertens* 2008;21:352-9.
10. Wong TY, Duncan BB, Golden SH, *et al.* Associations between the metabolic syndrome and retinal microvascular signs: the Atherosclerosis Risk In Communities study. *Invest Ophthalmol Vis Sci* 2004;45:2949-54.
11. Yatsuya H, Folsom AR, Wong TY, *et al.* Retinal microvascular abnormalities and risk of lacunar stroke: Atherosclerosis Risk in Communities Study. *Stroke* 2010;41:1349-55.
12. Wong TY, Klein R, Sharrett AR, *et al.* Retinal arteriolar narrowing and risk of coronary heart disease in men and women. The Atherosclerosis Risk in Communities Study. *JAMA* 2002;287:1153-9.
13. McGeechan K, Liew G, Macaskill P, *et al.* Meta-analysis: retinal vessel caliber and risk for coronary heart disease. *Ann Intern Med* 2009;151:404-13.
14. Sabanayagam C, Shankar A, Klein BE, *et al.* Bidirectional association of retinal vessel diameters and estimated GFR decline: the Beaver Dam CKD Study. *Am J Kidney Dis* 2011;57:682-91.
15. Sabanayagam C, Tai ES, Shankar A, *et al.* Retinal arteriolar narrowing increases the likelihood of chronic kidney disease in hypertension. *J Hypertens* 2009;27:2209-17.
16. van Hecke MV, Dekker JM, Nijpels G, *et al.* Are retinal microvascular abnormalities associated with large artery endothelial dysfunction and intima-media thickness? The Hoorn Study. *Clin Sci (Lond)* 2006;110:597-604.
17. Cuspidi C, Meani S, Salerno M, *et al.* Retinal microvascular changes and target organ damage in untreated essential hypertensives. *J Hypertens* 2004;22:2095-102.
18. Masaidi M, Cuspidi C, Giudici V, *et al.* Is retinal arteriolar-venular ratio associated with cardiac and extracardiac organ damage in essential hypertension? *J Hypertens* 2009;27:1277-83.
19. Torres FS, Fuchs SC, Maestri MK, *et al.* Association between carotid intima-media thickness and retinal arteriolar and venular diameter in patients with hypertension: a cross-sectional study. *Atherosclerosis* 2013;229:134-8.

- 1
  - 2
  - 3
  - 4
  - 5
  - 6
  - 7
  - 8
  - 9
  - 10
  - 11
  - 12
  - 13
  - 14
  - 15
  - 16
  - 17
  - 18
  - 19
  - 20
  - 21
  - 22
  - 23
  - 24
  - 25
  - 26
  - 27
  - 28
  - 29
  - 30
  - 31
  - 32
  - 33
  - 34
  - 35
  - 36
  - 37
  - 38
  - 39
  - 40
  - 41
  - 42
  - 43
  - 44
  - 45
  - 46
  - 47
  - 48
  - 49
  - 50
  - 51
  - 52
  - 53
  - 54
  - 55
  - 56
  - 57
  - 58
  - 59
  - 60
20. García-Ortiz L, Recio-Rodríguez JI, Parra-Sanchez J, *et al.* A new tool to assess retinal vessel caliber. Reliability and validity of measures and their relationship with cardiovascular risk. *Journal of Hypertension* 2012;30:770-77.
21. McGeechan K, Liew G, Macaskill P, *et al.* Risk prediction of coronary heart disease based on retinal vascular caliber (from the Atherosclerosis Risk In Communities [ARIC] Study). *Am J Cardiol* 2008;102:58-63.
22. Masters BR. Fractal analysis of the vascular tree in the human retina. *Annu Rev Biomed Eng* 2004;6:427-52.
23. Cheung CY, Ong S, Ikram MK, *et al.* Retinal Vascular Fractal Dimension is Associated with Cognitive Dysfunction. *J Stroke Cerebrovasc Dis* 2012.
24. Chen B, Tosha C, Gorin MB, *et al.* Analysis of autofluorescent retinal images and measurement of atrophic lesion growth in Stargardt disease. *Exp Eye Res* 2010;91:143-52.
25. Sanchez CI, Hornero R, Lopez MI, *et al.* A novel automatic image processing algorithm for detection of hard exudates based on retinal image analysis. *Med Eng Phys* 2008;30:350-7.
26. Heneghan C, Flynn J, O'Keefe M, *et al.* Characterization of changes in blood vessel width and tortuosity in retinopathy of prematurity using image analysis. *Med Image Anal* 2002;6:407-29.
27. Jagoe R, Blauth CI, Smith PL, *et al.* Automatic geometrical registration of fluorescein retinal angiograms. *Comput Biomed Res* 1990;23:403-9.
28. Mancia G, Fagard R, Narkiewicz K, *et al.* 2013 ESH/ESC Guidelines for the management of arterial hypertension: the Task Force for the management of arterial hypertension of the European Society of Hypertension (ESH) and of the European Society of Cardiology (ESC). *J Hypertens* 2013;31:1281-357.
29. O'Brien E, Asmar R, Beilin L, *et al.* Practice guidelines of the European Society of Hypertension for clinic, ambulatory and self blood pressure measurement. *J Hypertens* 2005;23:697-701.
30. Munir S, Guilcher A, Kamallesh T, *et al.* Peripheral augmentation index defines the relationship between central and peripheral pulse pressure. *Hypertension* 2008;51:112-8.
31. Kohara K, Tabara Y, Oshiumi A, *et al.* Radial augmentation index: a useful and easily obtainable parameter for vascular aging. *Am J Hypertens* 2005;18:115-145.
32. Van Bortel LM, Laurent S, Boutouyrie P, *et al.* Expert consensus document on the measurement of aortic stiffness in daily practice using carotid-femoral pulse wave velocity. *J Hypertens* 2012;30:445-8.
33. Gomez-Marcos MA, Recio-Rodríguez JI, Patino-Alonso MC, *et al.* Protocol for measuring carotid intima-media thickness that best correlates with cardiovascular risk and target organ damage. *Am J Hypertens* 2012;25:955-61.
34. Shirai K, Hiruta N, Song M, *et al.* Cardio-ankle vascular index (CAVI) as a novel indicator of arterial stiffness: theory, evidence and perspectives. *J Atheroscler Thromb* 2011;18:924-38.
35. Shirai K, Utino J, Otsuka K, *et al.* A novel blood pressure-independent arterial wall stiffness parameter; cardio-ankle vascular index (CAVI). *J Atheroscler Thromb* 2006;13:101-7.
36. Levey AS, Stevens LA, Schmid CH, *et al.* A new equation to estimate glomerular filtration rate. *Ann Intern Med* 2009;150:604-12.
37. Okin PM, Roman MJ, Devereux RB, *et al.* Electrocardiographic identification of increased left ventricular mass by simple voltage-duration products. *J Am Coll Cardiol* 1995;25:417-23.
38. D'Agostino RB, Sr., Vasan RS, Pencina MJ, *et al.* General cardiovascular risk profile for use in primary care: the Framingham Heart Study. *Circulation* 2008;117:743-53.
39. Goldbaum MH, Katz NP, Nelson MR, *et al.* The discrimination of similarly colored objects in computer images of the ocular fundus. *Invest Ophthalmol Vis Sci* 1990;31:617-23.
40. Kalviainen H, Hirvonen P, Xu L, *et al.* Probabilistic and non-probabilistic Hough transforms. *Image Vision Comput* 1995;13 239 -52.

- 1
- 2
- 3 41. Lee S, Wang Y, Lee E. A computer algorithm for automated detection and quantification of
- 4 microaneurysms and haemorrhages in color retinal images. *SPIE Conference on Image*
- 5 *Perception and Performance* 1999;3663 61–71.
- 6 42. Nielsen T. Bayesian networks and decision graphs. In: Springer FJ-, ed.: FV JENSEN -
- 7 Springer, 2009.
- 8 43. De Paz JF, Rodríguez S, Bajo J, *et al.* CBR System for Diagnosis of Patient: IEEE Computer
- 9 Society Press, 2009:807-12.
- 10 44. Rodríguez S, De Paz JF, Bajo J, *et al.* Applying CBR Sytems to Micro-Array Data
- 11 Classification. Proceedings of IWPACBB 2008: Springer Velag. Advances in Soft Computing
- 12 Series, 2008.
- 13 45. WMA. World Medical Association Declaration of Helsinki: ethical principles for medical
- 14 research involving human subjects. *JAMA* 2013;310:2191-4.
- 15 46. Wang JJ, Liew G, Wong TY, *et al.* Retinal vascular calibre and the risk of coronary heart
- 16 disease-related death. *Heart* 2006;92:1583-7.
- 17 47. Wong TY, Knudtson MD, Klein R, *et al.* A prospective cohort study of retinal arteriolar
- 18 narrowing and mortality. *Am J Epidemiol* 2004;159:819-25.
- 19 48. Wang JJ, Liew G, Klein R, *et al.* Retinal vessel diameter and cardiovascular mortality: pooled
- 20 data analysis from two older populations. *Eur Heart J* 2007;28:1984-92.
- 21
- 22
- 23
- 24
- 25
- 26
- 27
- 28
- 29
- 30
- 31
- 32
- 33
- 34
- 35
- 36
- 37
- 38
- 39
- 40
- 41
- 42
- 43
- 44
- 45
- 46
- 47
- 48
- 49
- 50
- 51
- 52
- 53
- 54
- 55
- 56
- 57
- 58
- 59
- 60

1  
2  
3 Figure 1. Detection and identification of vessels steps: locating the disk and identifying the center and  
4 edges of the retina  
5

6 Figure 2. Detection and identification of vessels steps: cataloging of veins and arteries  
7  
8  
9  
10  
11  
12  
13  
14  
15  
16  
17  
18  
19  
20  
21  
22  
23  
24  
25  
26  
27  
28  
29  
30  
31  
32  
33  
34  
35  
36  
37  
38  
39  
40  
41  
42  
43  
44  
45  
46  
47  
48  
49  
50  
51  
52  
53  
54  
55  
56  
57  
58  
59  
60

For peer review only

1  
2  
3  
4  
5  
6  
7  
8  
9  
10  
11  
12  
13  
14  
15  
16  
17  
18  
19  
20  
21  
22  
23  
24  
25  
26  
27  
28  
29  
30  
31  
32  
33  
34  
35  
36  
37  
38  
39  
40  
41  
42  
43  
44  
45  
46  
47  
48  
49  
50  
51  
52  
53  
54  
55  
56  
57  
58  
59  
60

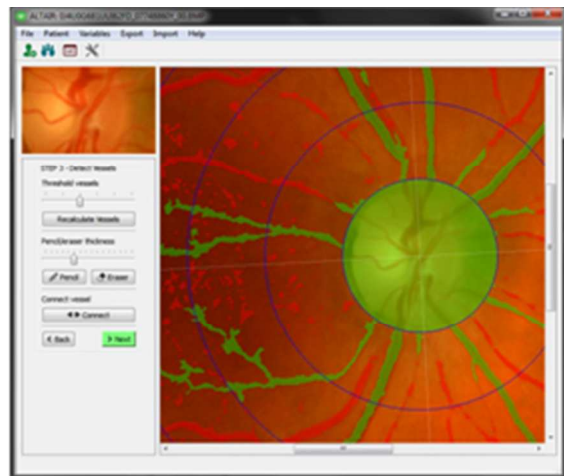

Detection and identification of vessels steps: locating the disk and identifying the center and edges of the retina  
75x62mm (96 x 96 DPI)

For peer review only



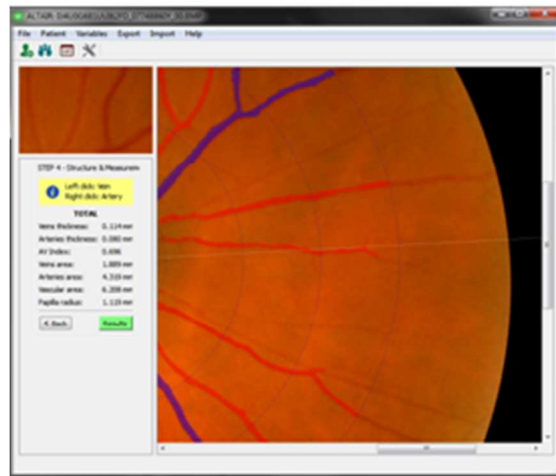

Detection and identification of vessels steps: cataloging of veins and arteries  
73x64mm (96 x 96 DPI)

## STROBE Statement—checklist of items that should be included in reports of observational studies

|                              | Item No | Recommendation                                                                                                                                                                                                                                                                                                                                                                                                                                                                                                                                                                                                                                                                                     |
|------------------------------|---------|----------------------------------------------------------------------------------------------------------------------------------------------------------------------------------------------------------------------------------------------------------------------------------------------------------------------------------------------------------------------------------------------------------------------------------------------------------------------------------------------------------------------------------------------------------------------------------------------------------------------------------------------------------------------------------------------------|
| <b>Title and abstract</b>    | 1       | X (a) Indicate the study's design with a commonly used term in the title or the abstract<br>(b) Provide in the abstract an informative and balanced summary of what was done and what was found                                                                                                                                                                                                                                                                                                                                                                                                                                                                                                    |
| <b>Introduction</b>          |         |                                                                                                                                                                                                                                                                                                                                                                                                                                                                                                                                                                                                                                                                                                    |
| Background/rationale         | 2       | X Explain the scientific background and rationale for the investigation being reported                                                                                                                                                                                                                                                                                                                                                                                                                                                                                                                                                                                                             |
| Objectives                   | 3       | X State specific objectives, including any prespecified hypotheses                                                                                                                                                                                                                                                                                                                                                                                                                                                                                                                                                                                                                                 |
| <b>Methods</b>               |         |                                                                                                                                                                                                                                                                                                                                                                                                                                                                                                                                                                                                                                                                                                    |
| Study design                 | 4       | X Present key elements of study design early in the paper                                                                                                                                                                                                                                                                                                                                                                                                                                                                                                                                                                                                                                          |
| Setting                      | 5       | X Describe the setting, locations, and relevant dates, including periods of recruitment, exposure, follow-up, and data collection                                                                                                                                                                                                                                                                                                                                                                                                                                                                                                                                                                  |
| Participants                 | 6       | (a) <i>Cohort study</i> —Give the eligibility criteria, and the sources and methods of selection of participants. Describe methods of follow-up<br><i>Case-control study</i> —Give the eligibility criteria, and the sources and methods of case ascertainment and control selection. Give the rationale for the choice of cases and controls<br>X <i>Cross-sectional study</i> —Give the eligibility criteria, and the sources and methods of selection of participants<br>(b) <i>Cohort study</i> —For matched studies, give matching criteria and number of exposed and unexposed<br><i>Case-control study</i> —For matched studies, give matching criteria and the number of controls per case |
| Variables                    | 7       | X Clearly define all outcomes, exposures, predictors, potential confounders, and effect modifiers. Give diagnostic criteria, if applicable                                                                                                                                                                                                                                                                                                                                                                                                                                                                                                                                                         |
| Data sources/<br>measurement | 8*      | X For each variable of interest, give sources of data and details of methods of assessment (measurement). Describe comparability of assessment methods if there is more than one group                                                                                                                                                                                                                                                                                                                                                                                                                                                                                                             |
| Bias                         | 9       | X Describe any efforts to address potential sources of bias                                                                                                                                                                                                                                                                                                                                                                                                                                                                                                                                                                                                                                        |
| Study size                   | 10      | X Explain how the study size was arrived at                                                                                                                                                                                                                                                                                                                                                                                                                                                                                                                                                                                                                                                        |
| Quantitative variables       | 11      | Explain how quantitative variables were handled in the analyses. If applicable, describe which groupings were chosen and why                                                                                                                                                                                                                                                                                                                                                                                                                                                                                                                                                                       |
| Statistical methods          | 12      | X (a) Describe all statistical methods, including those used to control for confounding<br>(b) Describe any methods used to examine subgroups and interactions<br>(c) Explain how missing data were addressed<br>(d) <i>Cohort study</i> —If applicable, explain how loss to follow-up was addressed<br><i>Case-control study</i> —If applicable, explain how matching of cases and controls was addressed<br><i>Cross-sectional study</i> —If applicable, describe analytical methods taking account of sampling strategy<br>(e) Describe any sensitivity analyses                                                                                                                                |

Continued on next page

**Results (not applicable)**

|                  |     |                                                                                                                                                                                                                                                                                                                                                                                                               |
|------------------|-----|---------------------------------------------------------------------------------------------------------------------------------------------------------------------------------------------------------------------------------------------------------------------------------------------------------------------------------------------------------------------------------------------------------------|
| Participants     | 13* | (a) Report numbers of individuals at each stage of study—eg numbers potentially eligible, examined for eligibility, confirmed eligible, included in the study, completing follow-up, and analysed<br>(b) Give reasons for non-participation at each stage<br>(c) Consider use of a flow diagram                                                                                                               |
| Descriptive data | 14* | (a) Give characteristics of study participants (eg demographic, clinical, social) and information on exposures and potential confounders<br>(b) Indicate number of participants with missing data for each variable of interest<br>(c) <i>Cohort study</i> —Summarise follow-up time (eg, average and total amount)                                                                                           |
| Outcome data     | 15* | <i>Cohort study</i> —Report numbers of outcome events or summary measures over time<br><i>Case-control study</i> —Report numbers in each exposure category, or summary measures of exposure<br><i>Cross-sectional study</i> —Report numbers of outcome events or summary measures                                                                                                                             |
| Main results     | 16  | (a) Give unadjusted estimates and, if applicable, confounder-adjusted estimates and their precision (eg, 95% confidence interval). Make clear which confounders were adjusted for and why they were included<br>(b) Report category boundaries when continuous variables were categorized<br>(c) If relevant, consider translating estimates of relative risk into absolute risk for a meaningful time period |
| Other analyses   | 17  | Report other analyses done—eg analyses of subgroups and interactions, and sensitivity analyses                                                                                                                                                                                                                                                                                                                |

**Discussion (not applicable)**

|                  |    |                                                                                                                                                                            |
|------------------|----|----------------------------------------------------------------------------------------------------------------------------------------------------------------------------|
| Key results      | 18 | Summarise key results with reference to study objectives                                                                                                                   |
| Limitations      | 19 | Discuss limitations of the study, taking into account sources of potential bias or imprecision. Discuss both direction and magnitude of any potential bias                 |
| Interpretation   | 20 | Give a cautious overall interpretation of results considering objectives, limitations, multiplicity of analyses, results from similar studies, and other relevant evidence |
| Generalisability | 21 | Discuss the generalisability (external validity) of the study results                                                                                                      |

**Other information**

|         |    |                                                                                                                                                               |
|---------|----|---------------------------------------------------------------------------------------------------------------------------------------------------------------|
| Funding | 22 | Give the source of funding and the role of the funders for the present study and, if applicable, for the original study on which the present article is based |
|---------|----|---------------------------------------------------------------------------------------------------------------------------------------------------------------|

\*Give information separately for cases and controls in case-control studies and, if applicable, for exposed and unexposed groups in cohort and cross-sectional studies.

**Note:** An Explanation and Elaboration article discusses each checklist item and gives methodological background and published examples of transparent reporting. The STROBE checklist is best used in conjunction with this article (freely available on the Web sites of PLoS Medicine at <http://www.plosmedicine.org/>, Annals of Internal Medicine at <http://www.annals.org/>, and Epidemiology at <http://www.epidem.com/>). Information on the STROBE Initiative is available at [www.strobe-statement.org](http://www.strobe-statement.org).

# BMJ Open

## Validation of the Automatic image analyzer to assess retinal vessel caliber (ALTAIR).Prospective study protocol.

|                                 |                                                                                                                                                                                                                                                                                                                                                                                                                                                                                                                                                                                                                                                                                                                                                                                                                                                                                                                                                                                                                                                                                                                                                                                                                                                                                                                                                                                                                                                                                                                                                                                                                                                                                                                                                                                                                                                                                             |
|---------------------------------|---------------------------------------------------------------------------------------------------------------------------------------------------------------------------------------------------------------------------------------------------------------------------------------------------------------------------------------------------------------------------------------------------------------------------------------------------------------------------------------------------------------------------------------------------------------------------------------------------------------------------------------------------------------------------------------------------------------------------------------------------------------------------------------------------------------------------------------------------------------------------------------------------------------------------------------------------------------------------------------------------------------------------------------------------------------------------------------------------------------------------------------------------------------------------------------------------------------------------------------------------------------------------------------------------------------------------------------------------------------------------------------------------------------------------------------------------------------------------------------------------------------------------------------------------------------------------------------------------------------------------------------------------------------------------------------------------------------------------------------------------------------------------------------------------------------------------------------------------------------------------------------------|
| Journal:                        | <i>BMJ Open</i>                                                                                                                                                                                                                                                                                                                                                                                                                                                                                                                                                                                                                                                                                                                                                                                                                                                                                                                                                                                                                                                                                                                                                                                                                                                                                                                                                                                                                                                                                                                                                                                                                                                                                                                                                                                                                                                                             |
| Manuscript ID:                  | bmjopen-2014-006144.R1                                                                                                                                                                                                                                                                                                                                                                                                                                                                                                                                                                                                                                                                                                                                                                                                                                                                                                                                                                                                                                                                                                                                                                                                                                                                                                                                                                                                                                                                                                                                                                                                                                                                                                                                                                                                                                                                      |
| Article Type:                   | Protocol                                                                                                                                                                                                                                                                                                                                                                                                                                                                                                                                                                                                                                                                                                                                                                                                                                                                                                                                                                                                                                                                                                                                                                                                                                                                                                                                                                                                                                                                                                                                                                                                                                                                                                                                                                                                                                                                                    |
| Date Submitted by the Author:   | 08-Nov-2014                                                                                                                                                                                                                                                                                                                                                                                                                                                                                                                                                                                                                                                                                                                                                                                                                                                                                                                                                                                                                                                                                                                                                                                                                                                                                                                                                                                                                                                                                                                                                                                                                                                                                                                                                                                                                                                                                 |
| Complete List of Authors:       | <p>GarciaOrtiz, Luis; Castilla and León Health Service (SACYL). Network of Preventive Activities and Health Promotion in Primary Care (REDIAPP), Salamanca Institute for Biomedical Research. (IBSAL)., Primary care research unit La Alamedilla,</p> <p>Gomez-Marcos, Manuel; Salamanca Institute for Biomedical Research. (IBSAL)., Primary care research unit La Alamedilla, Castilla and León Health Service (SACYL). Network of Preventive Activities and Health Promotion in Primary Care (REDIAPP)</p> <p>Recio-Rodriguez, Jose; Salamanca Institute for Biomedical Research. (IBSAL)., Primary care research unit La Alamedilla, Castilla and León Health Service (SACYL). Network of Preventive Activities and Health Promotion in Primary Care (REDIAPP)</p> <p>Maderuelo-Fernandez, Jose; Salamanca Institute for Biomedical Research. (IBSAL)., Primary care research unit La Alamedilla, Castilla and León Health Service (SACYL). Network of Preventive Activities and Health Promotion in Primary Care (REDIAPP)</p> <p>Chamoso-Santos, Pablo; University of Salamanca. Salamanca Institute for Biomedical Research. (IBSAL), BISITE Research group. Computers and Automation Department</p> <p>Rodriguez-Gonzalez, Sara; University of Salamanca. Salamanca Institute for Biomedical Research. (IBSAL), BISITE Research group. Computers and Automation Department</p> <p>De Paz, Juan; University of Salamanca. Salamanca Institute for Biomedical Research. (IBSAL), BISITE Research group. Computers and Automation Department</p> <p>Merchan-Cifuentes, Miguel; University of Salamanca. Salamanca Institute for Biomedical Research. (IBSAL)., Castilla and León Neuroscience Institute</p> <p>Corchado-Rodriguez, Juan; University of Salamanca. Salamanca Institute for Biomedical Research. (IBSAL), BISITE Research group. Computers and Automation Department</p> |
| <b>Primary Subject Heading</b>: | Ophthalmology                                                                                                                                                                                                                                                                                                                                                                                                                                                                                                                                                                                                                                                                                                                                                                                                                                                                                                                                                                                                                                                                                                                                                                                                                                                                                                                                                                                                                                                                                                                                                                                                                                                                                                                                                                                                                                                                               |
| Secondary Subject Heading:      | Cardiovascular medicine, Ophthalmology                                                                                                                                                                                                                                                                                                                                                                                                                                                                                                                                                                                                                                                                                                                                                                                                                                                                                                                                                                                                                                                                                                                                                                                                                                                                                                                                                                                                                                                                                                                                                                                                                                                                                                                                                                                                                                                      |
| Keywords:                       | VASCULAR MEDICINE, Medical retina < OPHTHALMOLOGY, PRIMARY CARE                                                                                                                                                                                                                                                                                                                                                                                                                                                                                                                                                                                                                                                                                                                                                                                                                                                                                                                                                                                                                                                                                                                                                                                                                                                                                                                                                                                                                                                                                                                                                                                                                                                                                                                                                                                                                             |
|                                 |                                                                                                                                                                                                                                                                                                                                                                                                                                                                                                                                                                                                                                                                                                                                                                                                                                                                                                                                                                                                                                                                                                                                                                                                                                                                                                                                                                                                                                                                                                                                                                                                                                                                                                                                                                                                                                                                                             |

1  
2  
3  
4  
5  
6  
7  
8  
9  
10  
11  
12  
13  
14  
15  
16  
17  
18  
19  
20  
21  
22  
23  
24  
25  
26  
27  
28  
29  
30  
31  
32  
33  
34  
35  
36  
37  
38  
39  
40  
41  
42  
43  
44  
45  
46  
47  
48  
49  
50  
51  
52  
53  
54  
55  
56  
57  
58  
59  
60

SCHOLARONE™  
Manuscripts

For peer review only

1  
2  
3 Title: **Validation of the Automatic image analyzer to assess retinal vessel**  
4 **caliber (ALTAIR).Prospective study protocol.**  
5  
6

7 Short title: **Altair study**  
8  
9

10  
11  
12 **Authors**

13  
14 Luis Garcia-Ortiz<sup>1,2</sup>, Manuel A. Gómez-Marcos<sup>1,2</sup>, Jose I. Recio-Rodríguez<sup>1</sup>, Jose A Maderuelo  
15  
16 Fernandez<sup>1</sup>, Pablo Chamoso-Santos<sup>3</sup>, Sara Rodríguez-González<sup>3</sup>, Juan F de Paz-Santana<sup>3</sup>, Miguel A  
17  
18 Merchan-Cifuentes<sup>4</sup>and Juan M Corchado-Rodríguez<sup>3</sup> on behalf of ALTAIR group.  
19  
20

- 21  
22  
23 1. Primary care research unit La Alamedilla, Castilla and León Health Service (SACYL). Network of  
24 Preventive Activities and Health Promotion in Primary Care (REDIAPP). Salamanca  
25 Institute for Biomedical Research. (IBSAL). Salamanca, Spain.  
26  
27 2. Department of Medicine. University of Salamanca.  
28  
29 3. BISITE Research group. Computers and Automation Department. University of Salamanca.  
30 Salamanca Institute for Biomedical Research. (IBSAL). Salamanca, Spain.  
31  
32 4. Castilla and León Neuroscience Institute. University of Salamanca. Salamanca  
33 Institute for Biomedical Research. (IBSAL). Salamanca, Spain.  
34  
35

36 **Corresponding author:**

37 Luis García Ortiz  
38 Unidad de Investigación, Centro de Salud La Alamedilla.  
39 37003 Salamanca. Spain.  
40 Tel:+34 923 290900-53550; fax +34 923 123644  
41 e-mail: Lgarciao@usal.es  
42  
43

44  
45 **E-mail:**

46 LGO: Lgarciao@usal.es  
47 MGM: magomez@usal.es  
48 JIR: donrecio@gmail.com  
49 JAM: jmaderuelo@saludcastillayleon.es  
50 PCS: chamoso@usal.es  
51 SRM: srg@usal.es  
52 JFP: fcofds@usal.es  
53 MMC: merchan@usal.es  
54 JMC: corchado@usal.es  
55  
56  
57  
58  
59  
60

**ABSTRACT**

**Introduction:** The fundus examination is a non-invasive evaluation of the microcirculation of the retina. The aim of the present study is to develop and validate (reliability and validity) the *Altair* software platform (Automatic image analyser to assess retinal vessel calibre) in order to analyse its utility in different clinical environments.

**Methods and analysis:** A cross-sectional study in the first phase and a prospective observational study in the second with 4-year of follow-up. The study will be performed in a primary care including 386 subjects. The main measurements will include carotid intima-media thickness, pulse wave velocity by Sphygmocor, cardio-ankle vascular index through the VASERA VS-1500®, cardiac evaluation by a digital ECG and renal injury by microalbuminuria and glomerular filtration. The retinal vascular evaluation will be performed using a TOPCON TRCNW200 non-mydratic retinal camera to obtain digital images of the retina, and the developed software (*Altair*) will be used to automatically calculate the caliber of the retinal vessels, the vascularised area, and the branching pattern. For software validation, the intra and inter-observer reliability, the concurrent validity of the vascular structure and function, as well as the association between the estimated retinal parameters and the evolution or onset of new lesions in the target organs or cardiovascular diseases.

**Ethics and dissemination:** The study has been approved by the clinical research ethics committee of the healthcare area of Salamanca. All study participants will sign an informed consent to agree to participate in the study in compliance with the Declaration of Helsinki and the WHO standards for observational studies. Validation of this tool will provide greater reliability to the analysis of retinal vessels by decreasing the intervention of the observer and will result in increased validity through the use of additional information, especially in the areas of vascularisation and vessel branching patterns.

**Trial registration number:** Clinical Trials.gov Identifier: NCT02087605

**Key words:** Retinal vessel. Vascular stiffness. Cardiovascular diseases. Risk Assessment.

### Strengths and limitations of this study

- 1.-A new software to retinal vessels evaluation will be developed, the *Altair* platform.
- 2.-A complete evaluation of retinal vascularization, including an automatically calculate the caliber of the retinal vessels, the vascularised area, and the branching pattern will be performed.
- 3.-The inter and intra-observer reliability in determining the caliber of arterial and venous vessels, the vascularised surface, and branching patterns using the *Altair* software platform will be performed.
- 4.-The concurrent validity of the *Altair* software platform, by analysing the relationship between retinal parameters and other parameters of vascular structure and function will be performed
- 5.-The design of the study during the first phase is transversal; as a result, causality relations cannot be derived, i.e., only the associations among the analysed variables can be performed.



## INTRODUCTION

The fundus examination is a non-invasive evaluation of the retinal microcirculation and of the vascular damage caused by multiple cardiovascular risk factors. Different tools have been developed to evaluate the thickness of the retinal arteries and veins [1-7], yet, all of them require intervention of an observer to some extent. Moreover, the techniques and tools that are currently applied are manual or semiautomatic in nature, for which the observer has an important influence, thus providing limited information.

In population studies, an association has been found between the calibre of the retinal vessels and arterial hypertension [8], left ventricular hypertrophy [9], metabolic syndrome [10], stroke [11], and coronary heart disease [12], especially in women [13]. However, other studies disagree and show contradictory results regarding the evolution of the arteriosclerotic lesion and the calibre of the retinal vessels [14-16]. In this way, Cuspidi et al. [17] and Masaidi et al. [18] failed to detect an association between the calibre of the retinal vessels and target organ injuries (cardiac, vascular, and renal) in studies of two hypertensive populations. However, Torres et al. reported a negative association between carotid intima-media thickness (IMT) and the thickness of the retinal arteries but a positive association with the veins [19].

Recently, our group developed and validated a semiautomatic tool, the arteriovenous index calculator, to evaluate the vascular calibre of the retinal vessels [20] with reduced influence of the observer. This tool showed high reliability when measuring the calibre of the retinal vessels with an intraclass correlation coefficient (ICC) for intra- and inter-observers greater than 0.96 for veins, arteries, and the arteriovenous ratio (AVR). These measures, especially the venous calibre and the AVR, were also shown to be independent variables associated with estimated cardiovascular risk, according to the Framingham scale and the microvascular kidney lesions evaluated according to the level of microalbuminuria. This positive association between the cardiovascular risk and the venous calibre is in line with several published studies showing an association between the AVR and the risk of coronary heart disease [12 13 21]. However, longitudinal studies with a greater number of patients would help to clarify the discrepancies among previously published studies on cardiovascular risk and vascular structure and function. Moreover, it should not be forgotten that these tools provide less information than retinal imaging on the thickness of the arteries and veins, their branching patterns, and the vascularised areas, which may be relevant for

1  
2  
3 evaluating the status of the vascular tree and may be the cause of some of the discrepancies previously  
4 reported.  
5

6  
7 A new and different approach to the study of the vascular systems is the characterisation of the blood  
8 vessel patterns in the normal circulation of the human retina [22]. With this method, the distribution of the  
9 vessel patterns in the normal circulation of the human retina [22]. With this method, the distribution of the  
10 branching of the vascular system in a two-dimensional space can be analysed, and the geometrical  
11 complexity of the branching and the density of the retinal vessels can be quantified [23]. Indeed, the  
12 current scientific literature contains a number of publications on this subject [24-27].  
13  
14

15  
16 In the present study, a novel software platform for image processing of the structural properties of the  
17 vessels is proposed using a human fundus red-free camera. The "Automatic image analyser to assess  
18 retinal vessel calibre" (*Altair*) software platform employs analytical methods and artificial intelligence (AI)  
19 algorithms to detect the retinal parameters of interest. The sequence of the algorithms consists of a new  
20 methodology that can be used to determine the properties of the veins and arteries of the retina; together,  
21 this system unifies all of the methods for automation of the measuring processes of retinal vessels.  
22  
23  
24  
25  
26  
27  
28

29 Therefore, the **general aim** of the present study is the development and validation (reliability and validity)  
30 of the *Altair* software platform in order to analyse its utility in different clinical settings. The following  
31 specific objectives will be studied:  
32  
33  
34

- 35 i) To evaluate inter- and intra-observer reliability in determining the caliber of arterial and venous vessels,  
36 the vascularised surface, and branching patterns using the *Altair* software platform.  
37  
38  
39 ii) To evaluate the concurrent validity of the *Altair* software platform, in different populations and  
40 ethnicities, by analysing the relationship between retinal parameters and other parameters of vascular  
41 structure and function, including carotid IMT, pulse wave velocity (PWV), and the cardio-ankle vascular  
42 index (CAVI), as well as injuries in other target organs and the cardiovascular risk.  
43  
44  
45  
46  
47 iii) To evaluate the evolution of target organ injuries and cardiovascular morbidity and mortality according  
48 to the vascularisation parameters of the retina determined using the *Altair* software platform.  
49  
50  
51  
52  
53  
54  
55  
56  
57  
58  
59  
60

## METHOD AND ANALYSIS

### Study design

The first phase will be a cross-sectional study aimed at validating the developed tool. Subsequently, the second phase will consist of a prospective observational study with annual follow-up evaluations over 4 years. The study will be developed in a primary healthcare setting.

### Subjects

#### *Study population*

The population under study will consist of subjects from 35 to 74 years of age with a cardiovascular risk factor according to the 2013 European Society of Hypertension/European Society of Cardiology Guidelines [28]. Subjects were excluded due to the following criteria: psychic or cognitive disorders that interfere with the established requisites of the protocol; non-collaborative attitude; educational or comprehensive limitations; and severe comorbidities with a 12-month likelihood of life-threatening complications. A consecutive sampling of all patients sent to the research unit for cardiovascular risk evaluation will be performed, and those complying with the inclusion and exclusion criteria will be asked to participate until the estimated sample size is achieved. The subjects will be mostly Caucasian, majority ethnic group among patients attended in the health center, however, at least fifty ethnic minority subjects, to give more validity to the tool, will be included.

#### *Sample size*

The sample size has been set to detect a correlation coefficient among the pulse wave velocity (PWV), the gold standard measure of arterial stiffness, and the retinal parameters of 0.15, with an alpha risk of 0.05 and a beta risk of 0.20 and a 10% estimated loss regarding the difficulty of the technique or dropout on follow-up. As a result, a total of 386 patients will be included in this study. This number of patients will be adequate to detect a difference of 1 m/sec on the PWV among the AVR tertiles, considering a standard deviation (SD) of 2.22 m/sec with an alpha risk of 0.05 and a beta risk of 0.20.

#### *Variables and measurement instruments*

The general and potentially effect-modifying variables, such as age, gender, occupation, smoking, alcohol consumption, personal history and drug use will be documented.

#### *Laboratory determinations*

1  
2  
3 Venous blood sampling will be performed between 08:00 and 09:00 hours after the individuals fasted and  
4 abstained from smoking and the consumption of alcohol and caffeinated beverages for the previous 12  
5 hours. Fasting plasma glucose, creatinine, uric acid, serum total cholesterol, HDL-cholesterol and  
6 triglyceride concentrations will be measured using standard enzymatic automated methods. LDL  
7 cholesterol will be estimated by the Friedewald equation when the direct parameter will be not available.  
8 Glycated haemoglobin will be measured with an immune-turbidimetric assay. High sensitive C-reactive  
9 protein levels and fibrinogen concentrations will be determined by immunoturbidimetric assay. Blood  
10 samples will be collected in the health center, and will be analyzed at the University hospital of Salamanca  
11 in external quality assurance programs of the Spanish Society of Clinical Chemistry and Molecular  
12 Pathology.

### 23 ***Anthropometric measurements***

24 Body weight will be determined on two occasions using a homologated electronic scale (Seca 770;  
25 Medical scale and measurement systems, Birmingham, United Kingdom) following due calibration  
26 (precision  $\pm 0.1$  kg), with the patient wearing light clothing and shoeless. These readings will be rounded  
27 to 100 g. Height in turn will be measured with a portable system (Seca 222; Medical scale and  
28 measurement systems, Birmingham, United Kingdom), recording the average of two readings, and with  
29 the patient shoeless in the standing position. The values will be rounded to the closest centimeter. Body  
30 mass index (BMI) will be calculated as weight (kg) divided by height squared ( $m^2$ ). A value of  $> 30$   $kg/m^2$   
31 will be taken to define obesity. Waist circumference will be measured using a flexible graduated measuring  
32 tape with the patient in the standing position without clothing. The upper border of the iliac crests will be  
33 located, and the tape will be wrapped around above this point, parallel to the floor, ensuring that it will be  
34 adjusted without compressing the skin. Adiposity indices, waist-height and waist-hip, will also be  
35 calculated.

### 49 ***Office or clinical blood pressure***

50 Office blood pressure measurement will involve three measurements of systolic blood pressure (SBP) and  
51 diastolic blood pressure (DBP), using the average of the last two, with a validated OMRON model M10-IT  
52 sphygmomanometer (Omron Health Care, Kyoto, Japan), by following the recommendations of the  
53  
54  
55  
56  
57  
58  
59  
60

1  
2  
3 European Society of Hypertension[29]. Pulse pressure will be estimated with the mean values of the  
4  
5 second and third measurements.  
6  
7

### 8 9 ***Pulse wave velocity (PWV) and central (CAIx) and peripheral augmentation index (PAIx)***

10  
11 These parameters will be estimated using the SphygmoCor System (AtCor Medical Pty Ltd., Head Office,  
12  
13 West Ryde, Australia). With the patient sitting and resting his/her arm on a rigid surface, pulse wave  
14  
15 analysis will be performed with a sensor in the radial artery, using mathematical transformation to estimate  
16  
17 the aortic pulse wave. CAIx will be estimated from aortic wave morphology using the following formula:  
18  
19 increase in central pressure $\times$ 100/pulse pressure and it will be adjusted for heart rate at 75 bpm. PAIx is a  
20  
21 measurement taken directly from the late systolic shoulder of the peripheral arterial waveform, and is  
22  
23 defined as the ratio of the difference between the 2<sup>nd</sup> peak and diastolic pressure to the difference  
24  
25 between the 1<sup>st</sup> peak and diastolic pressure[30], it is age-dependent and could be a useful index of  
26  
27 vascular aging [31]. PAIx will be calculated as follows: (Second peak systolic blood pressure [SBP2] -  
28  
29 diastolic blood pressure [DBP])/(first peak SBP - DBP)  $\times$  100 (%) and it will be corrected for heart rate at  
30  
31 75 bpm and it will be reported as PAIx75. Carotid and femoral artery pulse waves will be analyzed, with  
32  
33 the patient in a supine position, using the SphygmoCor System (Vx pulse wave velocity), estimating the  
34  
35 delay as compared to the ECG wave and calculating PWV. Distance measurements will be taken with a  
36  
37 measuring tape from the sternal notch to the carotid and femoral arteries at the sensor location and will be  
38  
39 multiplied by 0.8. Subclinical organ damage of PWV will be defined as a carotid–femoral PWV >10 m/s [28  
40  
41 32].  
42

### 43 44 ***Assessment of vascular structure by carotid intima media thickness (IMT)***

45  
46 Carotid ultrasound to assess C-IMT will be performed by two investigators trained for this purpose before  
47  
48 starting the study. A Sonosite Micromax ultrasound device paired with a 5–10 MHz multi-frequency high-  
49  
50 resolution linear transducer with Sonocal software will be used for performing automatic measurements of  
51  
52 carotid IMT in order to optimize reproducibility. Measurements will be made of the common carotid after  
53  
54 the examination of a 10 mm longitudinal section at a distance of 1 cm from the bifurcation, performing  
55  
56 measurements in the proximal and in the distal wall in the lateral, anterior and posterior projections,  
57  
58 following an axis perpendicular to the artery to discriminate two lines, one for the intima-blood interface  
59  
60

1  
2  
3 and the other for the media-adventitious interface. A total of 6 measurements will be obtained of the right  
4 carotid and other 6 of the left carotid, using average values (average carotid IMT) and maximum values  
5 (maximum carotid IMT) automatically calculated by the software [33]. The measurements will be obtained  
6 with the subject lying down, with the head extended and slightly turned opposite to the examined carotid  
7 artery. The reliability was evaluated before the study began using the intraclass correlation coefficient,  
8 which showed values of 0.974 (95%CI: 0.935 to 0.990) for intra-observer agreement on repeated  
9 measurements in 20 subjects, and 0.897 (95%CI:0.740 to 0.959) for inter-observer agreement. According  
10 to the Bland-Altman analysis, the mean difference for intraobserver agreement (95% limits of agreement)  
11 was 0.022 (95%CI: -0.053 to 0.098) and intra-observer agreement was 0.012 (95%CI: -0.034 to 0.059).  
12 The average IMT will be considered abnormal if it measured > 0.90 mm, or if there will be atherosclerotic  
13 plaques with a diameter of 1.5 mm or a focal increase of 0.5 mm or 50% of the adjacent IMT [28].  
14  
15  
16  
17  
18  
19  
20  
21  
22  
23  
24

#### 25 **Cardio Ankle Vascular Index and Ankle-brachial index**

26  
27 Cardio Ankle Vascular Index (CAVI) and Ankle-brachial index (ABI) will be measured using Vasera device  
28 VS-1500® (Fukuda Denshi). The pulse wave velocity (PWV) will be calculated, as well as Cardio Ankle  
29 Vascular Index (CAVI), which gives a more accurate calculation of the atherosclerosis degree. CAVI  
30 integrates cardiovascular elasticity derived from the aorta to the ankle pulse velocity through an  
31 oscillometric method and it is used as a good measure of vascular stiffness and it doesn't depend on  
32 blood pressure [34]. CAVI values will be automatically calculated by substituting the stiffness parameter  $\beta$   
33 in the following equation to detect the vascular elasticity and the cardio-ankle PWV: Stiffness parameter  $\beta$   
34 =  $2\rho \times 1 / (P_s - P_d) \times \ln (P_s/P_d) \times PWV^2$ , where  $\rho$  is the blood density,  $P_s$  and  $P_d$  are SBP and DBP in  
35 mmHg, and the PWV is measured between the aortic valve and ankle. The average coefficient of the  
36 variation of the CAVI is less than 5%, which is small enough for clinical use and confirm that CAVI has  
37 favorable reproducibility [35]. Cardio Ankle Vascular Index and Ankle-brachial index will be measured at  
38 rest. For the study, the lowest ABI and the highest CAVI and PWV obtained will be considered.  
39  
40  
41  
42  
43  
44  
45  
46  
47  
48  
49  
50

#### 51 **Renal assessment**

52  
53 Kidney damage will be assessed by measuring estimated glomerular filtration rate using the CKD-EPI  
54 (Chronic Kidney Disease Epidemiology Collaboration) [36] equation and proteinuria, as assessed by the  
55 albumin/creatinine ratio following the criteria of the 2013 European Society of Hypertension/European  
56  
57  
58  
59  
60

1  
2  
3 Society of Cardiology Guidelines [28] Subclinical organ damage will be defined as a glomerular filtration  
4 rate below 30–60 ml/min/1.73 m<sup>2</sup> or microalbuminuria (30–300 mg/24 h), or albumin–creatinine ratio (30–  
5 300 mg/g; 3.4–34 mg/mmol) (preferably on morning spot urine). Renal disease will be defined as a  
6 glomerular filtration rate <30 mL/min/1.73 m<sup>2</sup> (BSA), proteinuria (>300 mg/24 h), or albumin/creatinine ratio  
7 > 300 mg/24 h [28].  
8  
9

### 10 11 12 **Cardiac assessment**

13  
14 Electrocardiographic examination will be performed using a General Electric MAC 3.500 ECG System  
15 (Niskayuna, New York, USA) that automatically measures wave voltage and duration and estimates the  
16 criteria of the Cornell voltage-duration product (Cornell VDP) [37]. Electrocardiographic LVH will be  
17 defined as a Sokolow–Lyon index >3.5 mV; RaVL >1.1 mV, Cornell voltage duration product >244 mV\*ms  
18 or RaVL >1.1 mV; [28].  
19  
20  
21  
22  
23  
24

### 25 **Cardiovascular risk assessment**

26  
27 Cardiovascular risk will be estimated using the score of the 2013 European Society of  
28 Hypertension/European Society of Cardiology Guidelines[28] and the risk equation (D'Agostino scale)  
29 based on the Framingham study [38]. Risk factors used include age, sex, total cholesterol, high-density  
30 lipoprotein cholesterol (HDL-C), and systolic blood pressure as quantitative variables, and drug treatment  
31 for hypertension, smoking, and history of diabetes mellitus as dichotomous variables.  
32  
33  
34  
35  
36

### 37 **Retinal vascular evaluation**

38  
39 Using a non-mydratric retinography, TOPCON TRC NW 200, (Topcon Europe B.C., Capelle a/d Ijssel, The  
40 Netherlands) in the sitting position, a nurse trained will get nasal and temporal images centered in papilla.  
41 Then using the specific software developed (*Altair*) will be automatically calculated the retinal vessels  
42 thickness, the AVR, the area vascularized and the pattern of branching.  
43  
44  
45  
46

### 47 **Development of *Altair* platform: Automatic image analyzer to assess retinal vessel caliber**

48  
49 The platform, called *Altair* "Automatic image analyzer to assess retinal vessel caliber", makes use of a  
50 methodology divided in different stages that are described below, to determine the characteristics of  
51 interest of the veins and arteries of the retina. This methodology uses artificial Intelligence (AI) techniques  
52 and analytical algorithms to discover retinal parameters of interest.  
53  
54  
55  
56  
57  
58  
59  
60

1  
2  
3 The methodology is separated into two phases: (i) Digitization of the retina, in which the different  
4 measures of the eye image are recognized. Here a data structure is created, which makes it possible to  
5 represent and process the retina. This phase is subdivided into the following steps as discussed below:  
6  
7 load image and eye detection, processing, detection and segmentation. (ii) Measurements, in which we  
8 work with retinas that have been previously identified. This phase includes extraction of knowledge and  
9 manual correction, or expert knowledge, if necessary.

10  
11  
12  
13 **Digitization of the retina:** To perform this phase, the following steps are necessary:

- 14  
15  
16  
17 1. Load image and eye detection: The platform will automatically try to determine which eye (left or right)  
18 is the image, based on the detection of the macula. In this step, if the automatic detection has been  
19 wrong, the supervisor can modify this value by simply clicking on the correct eye.  
20  
21  
22
- 23 2. Processing: In this step, then noise is reduced, the contrast is improved, the blurriness corrected and  
24 the edges are sharpened. Some of these actions can be carried out at the hardware level, which is to  
25 say with the features included with the camera. During the testing, retinography will be performed  
26 using a Topcon TRC NW 200 nonmydriatic retinal camera, obtaining nasal and temporal images  
27 centered on the disk.  
28  
29  
30  
31  
32
- 33 3. Detection limits: In this step, the platform is capable of locating the disk and identifying the center and  
34 edges of the retina (figure 1). The identification of the papilla is vital since it helps as the starting point  
35 for the detection and identification of the different blood vessels. The platform builds a data structure  
36 that identifies each part of the retina based on the matrices of colors representing the images  
37 obtained. In this step, image processing techniques [24 26] will be used to detect intensity based on  
38 the boundaries of the structures.  
39  
40  
41  
42  
43  
44
- 45 4. Segmentation: In order to detect the limits, it became necessary to carry out a process of image  
46 segmentation. Segmentation is the process that divides an image into regions or objects whose pixels  
47 have similar attributes. Each segmented region typically has a physical significance within the image.  
48 It is one of the most important processes in an automated vision system because it makes it possible  
49 to extract the objects from the image for subsequent description and recognition [39-41]. This step  
50 can be considered the heart of the methodology proposed and used in the platform and perform the  
51 following actions:  
52  
53  
54  
55  
56  
57  
58  
59  
60



- 1  
2  
3 a. Identification of vessels. Blood vessels are identified in the image by thresholding  
4 techniques. Their purpose is to remove pixels where the structuring element does not enter,  
5 in this case the blood vessels. The platform offers here a number of useful options for  
6 experts: Threshold vessels, in order to modify the threshold level automatically taken to a  
7 new vessel detection. Recalculate vessels, recalculate the vessels taking as the threshold  
8 established with the previous parameter. Pencil/eraser thickness: Sets thickness to draw or  
9 erase lines / vessels to switch vessels. Connect: Selecting this option and interacting on the  
10 overall image of the retina, the application connects those vessels whose structure has been  
11 divided as they were not detected section.  
12  
13  
14  
15  
16  
17  
18  
19  
20  
21 b. Structure of vessel. At the end of this stage the entire arterio-venous tree is stored in a  
22 structured way, making it possible to know not only if a vessel passes through a point or not,  
23 but through which point each vessel passes, which one is its parent, etc.  
24  
25  
26  
27 c. Cataloging of veins and arteries (Figure 2). In this step the platform detects whether a vessel  
28 is vein or artery, main branch is taken of the vessel. In this step different classifiers based on  
29 IA as decision trees and Bayesian networks [42] are applied.  
30  
31  
32

### 33 Measurements

34  
35 In this second phase, the results obtained are presented. The platform can display the following  
36 measures: thickness of the veins in  $\mu\text{m}$ , artery thickness in  $\mu\text{m}$ , AVR (ratio between the thickness of the  
37 arteries and veins thickness), veins area in square  $\mu\text{m}$ , artery area in square  $\mu\text{m}$ , area of all vessels in  
38 square  $\mu\text{m}$ , radio papilla in millimeters.  
39  
40  
41  
42

43 The platform also generates internally combined parameters by quadrants and circles. These values are  
44 visible when it comes to export CSV files either individually or together with other existing images already  
45 processed database values.  
46  
47  
48

49 Results of its validity analysis must be consistent with the findings from researches focused on both  
50 cardiovascular risk estimation and evaluation of target organ damage. The results obtained during the use  
51 of the platform will be connected and used to extract additional information by using reasoning models  
52 such as case-based reasoning (CBR) [43] [44].  
53  
54  
55  
56  
57  
58  
59  
60

1  
2  
3 As conclusion, the platform is robust to the changes in the appearance of retinal fundus images typically  
4 encountered in clinical environments, and is proposed as a unified platform to connect all the methods  
5 needed to automate all processes of measurement on the retinas.  
6  
7

### 8 **Retinal software validation**

9  
10 To validate the retinal software platform, the following steps will be completed by the evaluators after  
11 previous training in imaging appreciation.  
12

13 -Evaluation of the reliability or precision

14  
15 1. Intra-observer variability: To evaluate the measurement repeatability, the operator must measure the  
16 same image of an individual on at least two occasions. To this end, an operator will measure 100 images  
17 of a random subsample of 50 patients with a 1-week difference between the two measurements. In this  
18 case, the operator and the analysed images will be the same on both days, and the information from the  
19 previous measurement will be unknown.  
20  
21

22  
23 2. Inter-observer variability: To evaluate the reproducibility of the measurement system, a different  
24 operator than who completed the assessment in phase 1 will evaluate the same 100 images previously  
25 analysed. The information from the results obtained in the previous phase will be unknown to this  
26 operator, and both operators will have the same experience in the subject and pertaining to the use of the  
27 software. Furthermore, both operators will receive the same preparatory training.  
28  
29

30 -Evaluation the validity (accuracy)

31  
32 3. To assess the degree of agreement between Altair and the AV Index calculator® software (1),  
33 previously validated by us, the evaluation of 100 images will be performed using both tools. In this way, we  
34 will be able to demonstrate that the new method, apart from providing the same results, is more objective  
35 and faster in elaborating the results.  
36  
37

38  
39 4. The measurement validity will be analysed in a total sample of 386 subjects and 772 retinographies, in  
40 regards to the relationship between the results of the carotid IMT, as a measurement of vascular structure,  
41 the PWV, the gold standard measure of arterial stiffness, the CAVI, kidney function, electrocardiographic  
42 parameters, and the estimated cardiovascular risk using different scales.  
43  
44  
45  
46  
47  
48  
49  
50  
51  
52  
53  
54  
55  
56  
57  
58  
59  
60

1  
2  
3 5. The association between different estimated parameters of the retina with the evolution or onset of new  
4 lesions in the target organs will be analysed, as well as any cardiovascular events that occur during the 4-  
5 year follow-up of the second phase of this project.  
6  
7

### 8 **Statistical analysis**

9  
10 The data corresponding to quantitative variables with a normal distribution will be presented with the mean  
11 and standard deviation and with the median and an interquartile range if the distribution is asymmetric,  
12 while the qualitative variables will be presented according to the distribution of the frequencies. Normality  
13 will be evaluated with the Kolmogorov–Smirnov test. The Pearson’s Chi-squared test will be used to  
14 analyse associations between the qualitative variables. The mean comparison, in the case of two groups,  
15 will be performed using the Student’s t-test for independent samples and, in the case of larger groups, the  
16 ANOVA test. Post-hoc contrasts will be performed with the least significant difference (LSD) method and  
17 an alpha value <0.05. Repeated data will be analysed with the Student’s t-test for paired data. The  
18 relationship between quantitative variables will be analysed according to the Pearson’s or Spearman’s  
19 correlation coefficient, depending on the type of distribution being considered. Finally, a multivariate  
20 analysis with multiple lineal regressions will be performed to analyse the association of the retinal  
21 parameters generated by *Altair* with the vascular structure and function. To contrast the hypothesis, an  
22 alpha risk of 0.05 will be set as the limit of statistical significance. Statistical analysis will be performed  
23 using SPSS/PC+ software version 20.0.  
24  
25  
26  
27  
28  
29  
30  
31  
32  
33  
34  
35  
36  
37  
38

39 For validation of the retinal software, we will evaluate the measurements of artery and vein thickness,  
40 vascularised surfaces, and branching patterns from the three phases of validation, and the intraclass  
41 correlation coefficient (ICC) will be calculated as a comparative method. Using the Bland-Altman method,  
42 the limits of agreement between the measurements of the observers will be evaluated. The kappa  
43 agreement coefficient will be analysed to categorise the variable. This coefficient will allow us to evaluate  
44 the degree of agreement between the two methods. The accordance validity will also be analysed via  
45 correlation and multiple regression analysis, by evaluating the degree of association with other parameters  
46 of vascular structure and function and target organ injury.  
47  
48  
49  
50  
51  
52  
53  
54

### 55 **Project schedule**

1  
2  
3 This project is on a 5-year plan, with the aim of developing and validating the *Altair* software platform  
4 during the first year. Subsequently, a 4-year follow-up study will be performed to evaluate the evolution of  
5 target organ injuries, as well as the cardiovascular risk on the analysed retinal vascularisation parameters,  
6 i.e., the artery and vein thickness, the vascularised surface, and the branching patterns. An exhaustive  
7 evaluation of the subject will be performed at baseline and during the third and fifth years. A short  
8 evaluation will be performed during the second and fourth years.

### 15 **Quality control**

16  
17 In order to ensure data quality, the professionals in charge of assessment retinal images and data  
18 collection will receive specific training. Regular external monitoring will then be performed to verify  
19 adequate application of methods, both in performing the different examinations and collecting the  
20 information.  
21  
22  
23

### 25 **Ethical and legal issues**

26  
27 The study has been approved by the clinical research ethics committee (CEIC) of the healthcare area of  
28 Salamanca ("CEIC of Area de Salud de Salamanca", 29 January, 2014). Subjects will be required to sign  
29 the informed consent prior to inclusion in the study, in accordance with the Declaration of Helsinki [45].  
30 Subjects will be informed of the objectives of the project and of the risks and benefits of the examinations  
31 made. None of the examinations pose life-threatening risks for the type of subjects to be included in the  
32 study. The study includes the obtainment of biological samples; the study subjects therefore will be  
33 informed in detail. The confidentiality of the recruited subjects will be ensured at all times in accordance  
34 with the provisions of current legislation on personal data protection (15/1999 of 13 December, LOPD),  
35 and the conditions contemplated by Act 14/2007 on biomedical research.  
36  
37  
38  
39  
40  
41  
42  
43  
44

### 45 **Discussion**

46  
47 In a previous study performed by our group [20], we identified a positive association between the  
48 cardiovascular risk, estimated with the Framingham scale, and the retinal vessel calibre, mainly the  
49 venous calibre, and this association was maintained in the multivariate analysis. The arterial calibre, which  
50 also demonstrated a positive association, and the AVR, which demonstrated a negative association, seem  
51 to play a less relevant role than the venous calibre in regards to the cardiovascular risk.  
52  
53  
54  
55  
56  
57  
58  
59  
60

1  
2  
3 The positive association between the cardiovascular risk and the venous calibre is in accordance with  
4 several published studies showing an association between the AVR and the coronary heart disease risk  
5 [12 13 21]. For example, McGeecham et al. [21], showed that when including the arterial and venous  
6 thickness, the Framingham model improved coronary event prediction, but only in women. This finding  
7 was repeated in several studies and was recently reported in a meta-analysis [13], which seems to  
8 support the notion that microvascular disease could be more important than coronary heart disease in  
9 women than men [46]. However, these results have been variable, as Wong et al. in the Beaver Dam Eye  
10 study [47] described the lack of an association between the AVR and the cardiovascular morbidity and  
11 mortality in the examined subgroups. In addition, Wang JJ et al.[48] identified an association between  
12 venous calibre and coronary death in men but not in women.

13  
14 It is likely that some of these discrepancies are due to the different tools employed for evaluation of the  
15 retinal vessels, as all of these methods are manual or semiautomatic and, to a greater or lesser degree,  
16 are susceptible to the influence of the observer. The use of only particular information regarding the  
17 vascularisation of the retina may also influence the results. However, the *Altair* software platform resolves  
18 these problems. On the one hand, this platform is practically an automated tool with a low observer  
19 influence. In addition, we expect the inter- and intra-observer variability to be low and, as a result, the  
20 reliability to be significantly elevated. On the other hand, by using additional information on retinal  
21 vascularisation, the vascularised surface, the vascularisation patterns, and the artery and vein thickness,  
22 we expect to improve the validity of the tool and clarify the discrepancies reported in previous studies.

### 23 24 25 26 27 28 29 30 31 32 33 34 35 36 37 38 39 40 41 **Study limitations**

42 Data will be obtained from patients with a cardiovascular risk factor, who satisfy the inclusion criteria, and  
43 who were referred by a family physician to the Research Unit for vascular risk assessment. Thus, this  
44 approach uses a consecutive sampling method with inclusion criteria, i.e., a non-randomised sampling  
45 method. However, the size of the sample may buffer this limitation, and the real clinical conditions may  
46 lead us to a more real situation than that using more restrictive inclusion criteria for the study patients. The  
47 design of the study during the first phase is transversal; as a result, causality relations cannot be derived,  
48 i.e., only the associations among the analysed variables can be performed. Therefore, non-statistically  
49 detected associations between variables may be possible due to the sample size.  
50  
51  
52  
53  
54  
55  
56  
57  
58  
59  
60

**Abbreviations**

ALTAIR: Automatic image analyzer to assess retinal vessel caliber; ABI: Ankle-brachial index; Alx: Augmentation Index; BMI: Body mass index; CAVI: Cardio Ankle Vascular index; CKD-EPI: Chronic Kidney Disease Epidemiology Collaboration; DBP: Diastolic blood pressure; ESH: European Society of Hypertension; IMT: Intima-media thickness; PWV: Pulse Wave Velocity; SBP: Systolic blood pressure.

**Contributors** Conception of the idea for the study: L. Garcia-Ortiz and JM Corchado-Rodríguez. Development of the protocol, organization and funding: L. García-Ortiz, JM. Corchado-Rodríguez, J.I. Recio-Rodríguez, M.Á. Gómez-Marcos, JA Maderuelo, S. Rodríguez-González, JF. de Paz-Santana, and P. Chamoso-Santos. Writing of the manuscript: L. Garcia-Ortiz, JM Corchado-Rodríguez and MA. Gómez-Marcos. All the authors have read the draft critically, to make contributions, and approved the final text.

**Collaborators.** *Members of the Altair group:* Luis García-Ortiz, José I Recio-Rodríguez, Manuel A Gómez-Marcos, José A Maderuelo-Fernández, Sara Rodríguez-González, Juan F de Paz-Santana, Pablo Chamoso-Santos, Miguel Merchan-Cifuentes and Juan M Corchado-Rodríguez. María C Patino-Alonso, Emiliano Rodríguez-Sánchez, Diana Perez Arechaederra, Sara Mora Simón, Ángela de Cabo Laso, Carmela Rodriguez Martín, Luis F Valero Juan, Leticia Gómez-Sánchez, Cristina Agudo-Conde.

**Funding:** The project has been funded by the Institute of Health Carlos III of the Ministry of Economy and Competitiveness (Spain) through the Network for Prevention and Health Promotion in Primary Care (rediAPP, RD12/0005), co-financed with European Union ERDF, the Autonomous Government of Castilla and León (GRS 907/B/14 and intensification of research program) and Vicente y Garcia Corselas Foundation (Call 2013).

**Competing interests** None

**Patient consent** Obtained.

**Ethics approval** The study has been approved by the clinical research ethics committee of the healthcare area of Salamanca.

**Provenance and peer review** Not commissioned; peer reviewed for ethical and funding approval prior to submission.

## REFERENCIAS

1. Hubbard LD, Brothers RJ, King WN, *et al.* Methods for evaluation of retinal microvascular abnormalities associated with hypertension/sclerosis in the Atherosclerosis Risk in Communities Study. *Ophthalmology* 1999;106:2269-80.
2. Ikram MK, de Jong FJ, Vingerling JR, *et al.* Are retinal arteriolar or venular diameters associated with markers for cardiovascular disorders? The Rotterdam Study. *Invest Ophthalmol Vis Sci* 2004;45:2129-34.
3. Nguyen TT, Wang JJ, Sharrett AR, *et al.* Relationship of retinal vascular caliber with diabetes and retinopathy: the Multi-Ethnic Study of Atherosclerosis (MESA). *Diabetes Care* 2008;31:544-9.
4. Pose-Reino A, Gomez-Ulla F, Hayik B, *et al.* Computerized measurement of retinal blood vessel calibre: description, validation and use to determine the influence of ageing and hypertension. *J Hypertens* 2005;23:843-50.
5. Tikellis G, Wang JJ, Tapp R, *et al.* The relationship of retinal vascular calibre to diabetes and retinopathy: the Australian Diabetes, Obesity and Lifestyle (AusDiab) study. *Diabetologia* 2007;50:2263-71.
6. Cheung CY, Ikram MK, Sabanayagam C, *et al.* Retinal microvasculature as a model to study the manifestations of hypertension. *Hypertension* 2012;60:1094-103.
7. Ortega M, Barreira N, Novo J, *et al.* Sirius: a web-based system for retinal image analysis. *Int J Med Inform* 2010;79:722-32.
8. Tanabe Y, Kawasaki R, Wang JJ, *et al.* Retinal arteriolar narrowing predicts 5-year risk of hypertension in Japanese people: the Funagata study. *Microcirculation* 2010;17:94-102.
9. Tikellis G, Arnett DK, Skelton TN, *et al.* Retinal arteriolar narrowing and left ventricular hypertrophy in African Americans. the Atherosclerosis Risk in Communities (ARIC) study. *Am J Hypertens* 2008;21:352-9.
10. Wong TY, Duncan BB, Golden SH, *et al.* Associations between the metabolic syndrome and retinal microvascular signs: the Atherosclerosis Risk In Communities study. *Invest Ophthalmol Vis Sci* 2004;45:2949-54.
11. Yatsuya H, Folsom AR, Wong TY, *et al.* Retinal microvascular abnormalities and risk of lacunar stroke: Atherosclerosis Risk in Communities Study. *Stroke* 2010;41:1349-55.
12. Wong TY, Klein R, Sharrett AR, *et al.* Retinal arteriolar narrowing and risk of coronary heart disease in men and women. The Atherosclerosis Risk in Communities Study. *JAMA* 2002;287:1153-9.
13. McGeechan K, Liew G, Macaskill P, *et al.* Meta-analysis: retinal vessel caliber and risk for coronary heart disease. *Ann Intern Med* 2009;151:404-13.
14. Sabanayagam C, Shankar A, Klein BE, *et al.* Bidirectional association of retinal vessel diameters and estimated GFR decline: the Beaver Dam CKD Study. *Am J Kidney Dis* 2011;57:682-91.
15. Sabanayagam C, Tai ES, Shankar A, *et al.* Retinal arteriolar narrowing increases the likelihood of chronic kidney disease in hypertension. *J Hypertens* 2009;27:2209-17.
16. van Hecke MV, Dekker JM, Nijpels G, *et al.* Are retinal microvascular abnormalities associated with large artery endothelial dysfunction and intima-media thickness? The Hoorn Study. *Clin Sci (Lond)* 2006;110:597-604.
17. Cuspidi C, Meani S, Salerno M, *et al.* Retinal microvascular changes and target organ damage in untreated essential hypertensives. *J Hypertens* 2004;22:2095-102.

18. Masaidi M, Cuspidi C, Giudici V, *et al.* Is retinal arteriolar-venular ratio associated with cardiac and extracardiac organ damage in essential hypertension? *J Hypertens* 2009;27:1277-83.
19. Torres FS, Fuchs SC, Maestri MK, *et al.* Association between carotid intima-media thickness and retinal arteriolar and venular diameter in patients with hypertension: a cross-sectional study. *Atherosclerosis* 2013;229:134-8.
20. García-Ortiz L, Recio-Rodríguez JI, Parra-Sanchez J, *et al.* A new tool to assess retinal vessel caliber. Reliability and validity of measures and their relationship with cardiovascular risk. *Journal of Hypertension* 2012;30:770-77.
21. McGeechan K, Liew G, Macaskill P, *et al.* Risk prediction of coronary heart disease based on retinal vascular caliber (from the Atherosclerosis Risk In Communities [ARIC] Study). *Am J Cardiol* 2008;102:58-63.
22. Masters BR. Fractal analysis of the vascular tree in the human retina. *Annu Rev Biomed Eng* 2004;6:427-52.
23. Cheung CY, Ong S, Ikram MK, *et al.* Retinal Vascular Fractal Dimension is Associated with Cognitive Dysfunction. *J Stroke Cerebrovasc Dis* 2012.
24. Chen B, Tosha C, Gorin MB, *et al.* Analysis of autofluorescent retinal images and measurement of atrophic lesion growth in Stargardt disease. *Exp Eye Res* 2010;91:143-52.
25. Sanchez CI, Hornero R, Lopez MI, *et al.* A novel automatic image processing algorithm for detection of hard exudates based on retinal image analysis. *Med Eng Phys* 2008;30:350-7.
26. Heneghan C, Flynn J, O'Keefe M, *et al.* Characterization of changes in blood vessel width and tortuosity in retinopathy of prematurity using image analysis. *Med Image Anal* 2002;6:407-29.
27. Jago R, Blauth CI, Smith PL, *et al.* Automatic geometrical registration of fluorescein retinal angiograms. *Comput Biomed Res* 1990;23:403-9.
28. Mancia G, Fagard R, Narkiewicz K, *et al.* 2013 ESH/ESC Guidelines for the management of arterial hypertension: the Task Force for the management of arterial hypertension of the European Society of Hypertension (ESH) and of the European Society of Cardiology (ESC). *J Hypertens* 2013;31:1281-357.
29. O'Brien E, Asmar R, Beilin L, *et al.* Practice guidelines of the European Society of Hypertension for clinic, ambulatory and self blood pressure measurement. *J Hypertens* 2005;23:697-701.
30. Munir S, Guilcher A, Kamallesh T, *et al.* Peripheral augmentation index defines the relationship between central and peripheral pulse pressure. *Hypertension* 2008;51:112-8.
31. Kohara K, Tabara Y, Oshiumi A, *et al.* Radial augmentation index: a useful and easily obtainable parameter for vascular aging. *Am J Hypertens* 2005;18:115-145.
32. Van Bortel LM, Laurent S, Boutouyrie P, *et al.* Expert consensus document on the measurement of aortic stiffness in daily practice using carotid-femoral pulse wave velocity. *J Hypertens* 2012;30:445-8.
33. Gomez-Marcos MA, Recio-Rodríguez JI, Patino-Alonso MC, *et al.* Protocol for measuring carotid intima-media thickness that best correlates with cardiovascular risk and target organ damage. *Am J Hypertens* 2012;25:955-61.
34. Shirai K, Hiruta N, Song M, *et al.* Cardio-ankle vascular index (CAVI) as a novel indicator of arterial stiffness: theory, evidence and perspectives. *J Atheroscler Thromb* 2011;18:924-38.
35. Shirai K, Utino J, Otsuka K, *et al.* A novel blood pressure-independent arterial wall stiffness parameter; cardio-ankle vascular index (CAVI). *J Atheroscler Thromb* 2006;13:101-7.
36. Levey AS, Stevens LA, Schmid CH, *et al.* A new equation to estimate glomerular filtration rate. *Ann Intern Med* 2009;150:604-12.
37. Okin PM, Roman MJ, Devereux RB, *et al.* Electrocardiographic identification of increased left ventricular mass by simple voltage-duration products. *J Am Coll Cardiol* 1995;25:417-23.



- 1
- 2
- 3 38. D'Agostino RB, Sr., Vasan RS, Pencina MJ, *et al.* General cardiovascular risk profile for use in
- 4 primary care: the Framingham Heart Study. *Circulation* 2008;117:743-53.
- 5 39. Goldbaum MH, Katz NP, Nelson MR, *et al.* The discrimination of similarly colored objects in
- 6 computer images of the ocular fundus. *Invest Ophthalmol Vis Sci* 1990;31:617-23.
- 7 40. Kalviainen H, Hirvonen P, Xu L, *et al.* Probabilistic and non-probabilistic Hough transforms.
- 8 *Image Vision Comput* 1995;13 239 -52.
- 9 41. Lee S, Wang Y, Lee E. A computer algorithm for automated detection and quantification of
- 10 microaneurysms and haemorrhages in color retinal images. *SPIE Conference on Image*
- 11 *Perception and Performance* 1999;3663 61-71.
- 12 42. Nielsen T. Bayesian networks and decision graphs. In: Springer FJ-, ed.: FV JENSEN -
- 13 Springer, 2009.
- 14 43. De Paz JF, Rodríguez S, Bajo J, *et al.* CBR System for Diagnosis of Patient: IEEE Computer
- 15 Society Press, 2009:807-12.
- 16 44. Rodríguez S, De Paz JF, Bajo J, *et al.* Applying CBR Sytems to Micro-Array Data
- 17 Classification. Proceedings of IWPACBB 2008: Springer Velag. Advances in Soft Computing
- 18 Series, 2008.
- 19 45. WMA. World Medical Association Declaration of Helsinki: ethical principles for medical
- 20 research involving human subjects. *JAMA* 2013;310:2191-4.
- 21 46. Wang JJ, Liew G, Wong TY, *et al.* Retinal vascular calibre and the risk of coronary heart
- 22 disease-related death. *Heart* 2006;92:1583-7.
- 23 47. Wong TY, Knudtson MD, Klein R, *et al.* A prospective cohort study of retinal arteriolar
- 24 narrowing and mortality. *Am J Epidemiol* 2004;159:819-25.
- 25 48. Wang JJ, Liew G, Klein R, *et al.* Retinal vessel diameter and cardiovascular mortality: pooled
- 26 data analysis from two older populations. *Eur Heart J* 2007;28:1984-92.
- 27
- 28
- 29
- 30
- 31
- 32
- 33
- 34
- 35
- 36
- 37
- 38
- 39
- 40
- 41
- 42
- 43
- 44
- 45
- 46
- 47
- 48
- 49
- 50
- 51
- 52
- 53
- 54
- 55
- 56
- 57
- 58
- 59
- 60

1  
2  
3 Figure 1. Detection and identification of vessels steps: locating the disk and identifying the center and  
4 edges of the retina  
5

6 Figure 2. Detection and identification of vessels steps: cataloging of veins and arteries  
7  
8  
9  
10  
11  
12  
13  
14  
15  
16  
17  
18  
19  
20  
21  
22  
23  
24  
25  
26  
27  
28  
29  
30  
31  
32  
33  
34  
35  
36  
37  
38  
39  
40  
41  
42  
43  
44  
45  
46  
47  
48  
49  
50  
51  
52  
53  
54  
55  
56  
57  
58  
59  
60

For peer review only

1  
2  
3  
4  
5  
6  
7  
8  
9  
10  
11  
12  
13  
14  
15  
16  
17  
18  
19  
20  
21  
22  
23  
24  
25  
26  
27  
28  
29  
30  
31  
32  
33  
34  
35  
36  
37  
38  
39  
40  
41  
42  
43  
44  
45  
46  
47  
48  
49  
50  
51  
52  
53  
54  
55  
56  
57  
58  
59  
60

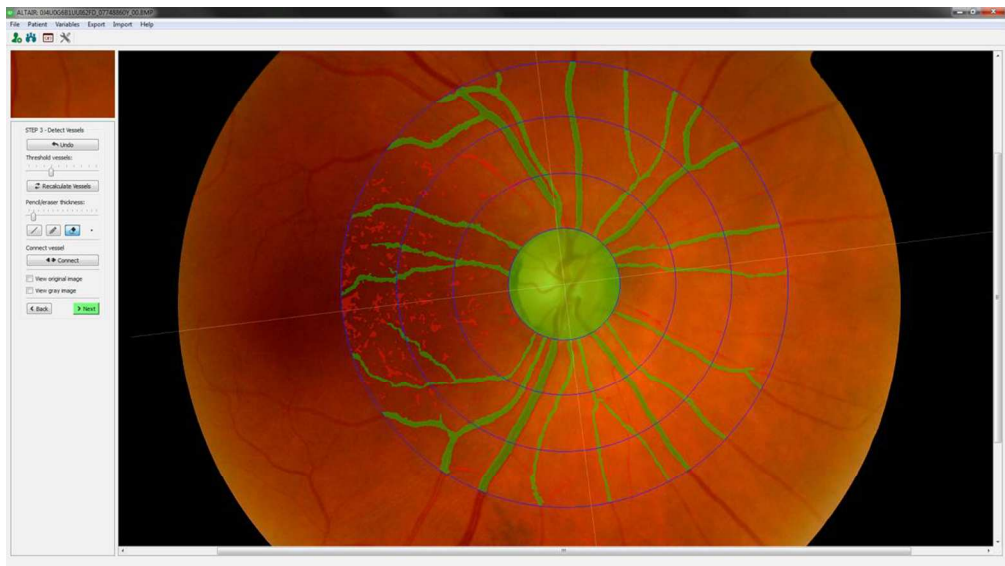

Detection and identification of vessels steps: locating the disk and identifying the center and edges of the retina  
104x59mm (300 x 300 DPI)

review only

1  
2  
3  
4  
5  
6  
7  
8  
9  
10  
11  
12  
13  
14  
15  
16  
17  
18  
19  
20  
21  
22  
23  
24  
25  
26  
27  
28  
29  
30  
31  
32  
33  
34  
35  
36  
37  
38  
39  
40  
41  
42  
43  
44  
45  
46  
47  
48  
49  
50  
51  
52  
53  
54  
55  
56  
57  
58  
59  
60

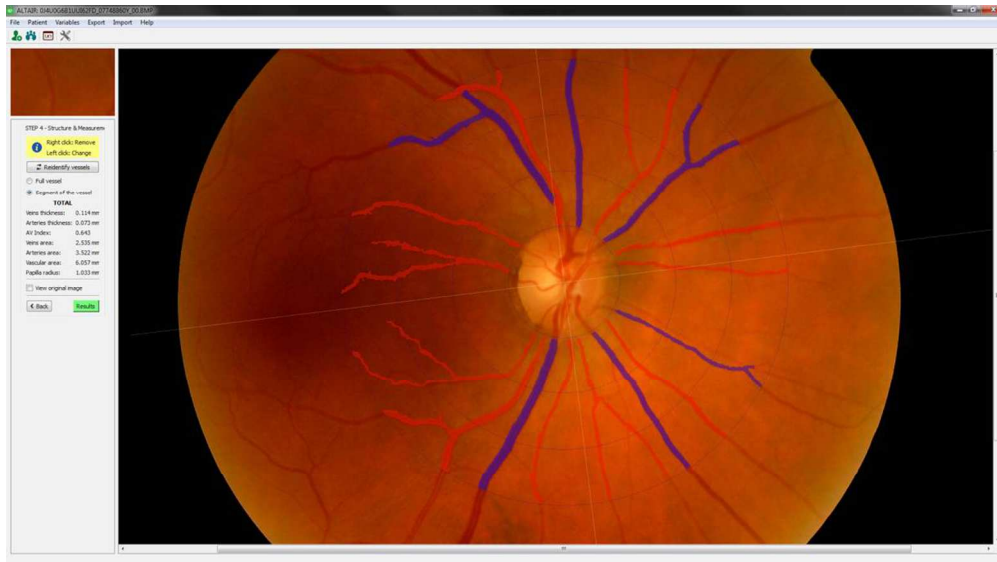

Detection and identification of vessels steps: cataloging of veins and arteries  
103x58mm (300 x 300 DPI)

review only

1  
2  
3 Title: **Validation of the Automatic image analyzer to assess retinal vessel**  
4 **caliber (ALTAIR).Prospective study protocol.**  
5  
6

7 Short title: **Altair study**  
8  
9  
10

11  
12 **Authors**  
13

14 Luis Garcia-Ortiz<sup>1,2</sup>, Manuel A. Gómez-Marcos<sup>1,2</sup>, Jose I. Recio-Rodríguez<sup>1</sup>, Jose A Maderuelo  
15 Fernandez<sup>1</sup>, Pablo Chamoso-Santos<sup>3</sup>, Sara Rodríguez-González<sup>3</sup>, Juan F de Paz-Santana<sup>3</sup>, Miguel A  
16 Merchan-Cifuentes<sup>4</sup>and Juan M Corchado-Rodríguez<sup>3</sup> on behalf of ALTAIR group.  
17  
18  
19  
20

- 21  
22  
23 1. Primary care research unit La Alamedilla, Castilla and León Health Service (SACYL). Network of  
24 Preventive Activities and Health Promotion in Primary Care (REDIAPP). Salamanca  
25 Institute for Biomedical Research. (IBSAL). Salamanca, Spain.  
26  
27 2. Department of Medicine. University of Salamanca.  
28  
29 3. BISITE Research group. Computers and Automation Department. University of Salamanca.  
30 Salamanca Institute for Biomedical Research. (IBSAL). Salamanca, Spain.  
31  
32 4. Castilla and León Neuroscience Institute. University of Salamanca. Salamanca  
33 Institute for Biomedical Research. (IBSAL). Salamanca, Spain.  
34  
35

36 **Corresponding author:**

37 Luis García Ortiz  
38 Unidad de Investigación, Centro de Salud La Alamedilla.  
39 37003 Salamanca. Spain.  
40 Tel:+34 923 290900-53550; fax +34 923 123644  
41 e-mail: Lgarciao@usal.es  
42  
43  
44

45 **E-mail:**

46 LGO: Lgarciao@usal.es  
47 MGM: magomez@usal.es  
48 JIR: donrecio@gmail.com  
49 JAM: jmaderuelo@saludcastillayleon.es  
50 PCS: chamoso@usal.es  
51 SRM: srg@usal.es  
52 JFP: fcofds@usal.es  
53 MMC: merchan@usal.es  
54 JMC: corchado@usal.es  
55  
56  
57  
58  
59  
60

## ABSTRACT

**Introduction:** The fundus examination is a non-invasive evaluation of the microcirculation of the retina. The aim of the present study is to develop and validate (reliability and validity) the *Altair* software platform (Automatic image analyser to assess retinal vessel calibre) in order to analyse its utility in different clinical environments.

**Methods and analysis:** A cross-sectional study in the first phase and a prospective observational study in the second with 4-year of follow-up. The study will be performed in a primary care including 386 subjects. The main measurements will include carotid intima-media thickness, pulse wave velocity by Sphygmocor, cardio-ankle vascular index through the VASERA VS-1500®, cardiac evaluation by a digital ECG and renal injury by microalbuminuria and glomerular filtration. The retinal vascular evaluation will be performed using a TOPCON TRCNW200 non-mydratic retinal camera to obtain digital images of the retina, and the developed software (*Altair*) will be used to automatically calculate the caliber of the retinal vessels, the vascularised area, and the branching pattern. For software validation, the intra and inter-observer reliability, the concurrent validity of the vascular structure and function, as well as the association between the estimated retinal parameters and the evolution or onset of new lesions in the target organs or cardiovascular diseases.

**Ethics and dissemination:** The study has been approved by the clinical research ethics committee of the healthcare area of Salamanca. All study participants will sign an informed consent to agree to participate in the study in compliance with the Declaration of Helsinki and the WHO standards for observational studies. Validation of this tool will provide greater reliability to the analysis of retinal vessels by decreasing the intervention of the observer and will result in increased validity through the use of additional information, especially in the areas of vascularisation and vessel branching patterns.

**Trial registration number:** Clinical Trials.gov Identifier: NCT02087605

**Key words:** Retinal vessel. Vascular stiffness. Cardiovascular diseases. Risk Assessment.

### Strengths and limitations of this study

- 1.-A new software to retinal vessels evaluation will be developed, the *Altair* platform.
- 2.-A complete evaluation of retinal vascularization, including an automatically calculate the caliber of the retinal vessels, the vascularised area, and the branching pattern will be performed.
- 3.-The inter and intra-observer reliability in determining the caliber of arterial and venous vessels, the vascularised surface, and branching patterns using the *Altair* software platform will be performed.
- 4.-The concurrent validity of the *Altair* software platform, by analysing the relationship between retinal parameters and other parameters of vascular structure and function will be performed
- 5.-The design of the study during the first phase is transversal; as a result, causality relations cannot be derived, i.e., only the associations among the analysed variables can be performed.

## INTRODUCTION

The fundus examination is a non-invasive evaluation of the retinal microcirculation and of the vascular damage caused by multiple cardiovascular risk factors. Different tools have been developed to evaluate the thickness of the retinal arteries and veins [1-7], yet, all of them require intervention of an observer to some extent. Moreover, the techniques and tools that are currently applied are manual or semiautomatic in nature, for which the observer has an important influence, thus providing limited information.

In population studies, an association has been found between the calibre of the retinal vessels and arterial hypertension [8], left ventricular hypertrophy [9], metabolic syndrome [10], stroke [11], and coronary heart disease [12], especially in women [13]. However, other studies disagree and show contradictory results regarding the evolution of the arteriosclerotic lesion and the calibre of the retinal vessels [14-16]. In this way, Cuspidi et al. [17] and Masaidi et al. [18] failed to detect an association between the calibre of the retinal vessels and target organ injuries (cardiac, vascular, and renal) in studies of two hypertensive populations. However, Torres et al. reported a negative association between carotid intima-media thickness (IMT) and the thickness of the retinal arteries but a positive association with the veins [19].

Recently, our group developed and validated a semiautomatic tool, the arteriovenous index calculator, to evaluate the vascular calibre of the retinal vessels [20] with reduced influence of the observer. This tool showed high reliability when measuring the calibre of the retinal vessels with an intraclass correlation coefficient (ICC) for intra- and inter-observers greater than 0.96 for veins, arteries, and the arteriovenous ratio (AVR). These measures, especially the venous calibre and the AVR, were also shown to be independent variables associated with estimated cardiovascular risk, according to the Framingham scale and the microvascular kidney lesions evaluated according to the level of microalbuminuria. This positive association between the cardiovascular risk and the venous calibre is in line with several published studies showing an association between the AVR and the risk of coronary heart disease [12 13 21]. However, longitudinal studies with a greater number of patients would help to clarify the discrepancies among previously published studies on cardiovascular risk and vascular structure and function. Moreover, it should not be forgotten that these tools provide less information than retinal imaging on the thickness of the arteries and veins, their branching patterns, and the vascularised areas, which may be relevant for



1  
2  
3 evaluating the status of the vascular tree and may be the cause of some of the discrepancies previously  
4 reported.  
5

6  
7 A new and different approach to the study of the vascular systems is the characterisation of the blood  
8 vessel patterns in the normal circulation of the human retina [22]. With this method, the distribution of the  
9 branching of the vascular system in a two-dimensional space can be analysed, and the geometrical  
10 complexity of the branching and the density of the retinal vessels can be quantified [23]. Indeed, the  
11 current scientific literature contains a number of publications on this subject [24-27].  
12  
13

14  
15 In the present study, a novel software platform for image processing of the structural properties of the  
16 vessels is proposed using a human fundus red-free camera. The "Automatic image analyser to assess  
17 retinal vessel calibre" (*Altair*) software platform employs analytical methods and artificial intelligence (AI)  
18 algorithms to detect the retinal parameters of interest. The sequence of the algorithms consists of a new  
19 methodology that can be used to determine the properties of the veins and arteries of the retina; together,  
20 this system unifies all of the methods for automation of the measuring processes of retinal vessels.  
21  
22

23  
24 Therefore, the **general aim** of the present study is the development and validation (reliability and validity)  
25 of the *Altair* software platform in order to analyse its utility in different clinical settings. The following  
26 specific objectives will be studied:  
27  
28

- 29  
30 i) To evaluate inter- and intra-observer reliability in determining the caliber of arterial and venous vessels,  
31 the vascularised surface, and branching patterns using the *Altair* software platform.  
32  
33 ii) To evaluate the concurrent validity of the *Altair* software platform, in different populations **and**  
34 **ethnicities**, by analysing the relationship between retinal parameters and other parameters of vascular  
35 structure and function, including carotid IMT, pulse wave velocity (PWV), and the cardio-ankle vascular  
36 index (CAVI), as well as injuries in other target organs and the cardiovascular risk.  
37  
38 iii) To evaluate the evolution of target organ injuries and cardiovascular morbidity and mortality according  
39 to the vascularisation parameters of the retina determined using the *Altair* software platform.  
40  
41  
42  
43  
44  
45  
46  
47  
48  
49  
50  
51  
52  
53  
54  
55  
56  
57  
58  
59  
60

## METHOD AND ANALYSIS

### Study design

The first phase will be a cross-sectional study aimed at validating the developed tool. Subsequently, the second phase will consist of a prospective observational study with annual follow-up evaluations over 4 years. The study will be developed in a primary healthcare setting.

### Subjects

#### *Study population*

The population under study will consist of subjects from 35 to 74 years of age with a cardiovascular risk factor according to the 2013 European Society of Hypertension/European Society of Cardiology Guidelines [28]. Subjects were excluded due to the following criteria: psychic or cognitive disorders that interfere with the established requisites of the protocol; non-collaborative attitude; educational or comprehensive limitations; and severe comorbidities with a 12-month likelihood of life-threatening complications. A consecutive sampling of all patients sent to the research unit for cardiovascular risk evaluation will be performed, and those complying with the inclusion and exclusion criteria will be asked to participate until the estimated sample size is achieved. **The subjects will be mostly Caucasian, majority ethnic group among patients attended in the health center, however, at least fifty ethnic minority subjects, to give more validity to the tool, will be included.**

#### *Sample size*

The sample size has been set to detect a correlation coefficient among the pulse wave velocity (PWV), the gold standard measure of arterial stiffness, and the retinal parameters of 0.15, with an alpha risk of 0.05 and a beta risk of 0.20 and a 10% estimated loss regarding the difficulty of the technique or dropout on follow-up. As a result, a total of 386 patients will be included in this study. This number of patients will be adequate to detect a difference of 1 m/sec on the PWV among the AVR tertiles, considering a standard deviation (SD) of 2.22 m/sec with an alpha risk of 0.05 and a beta risk of 0.20.

#### *Variables and measurement instruments*

The general and potentially effect-modifying variables, such as age, gender, occupation, smoking, alcohol consumption, personal history and drug use will be documented.

#### *Laboratory determinations*

1  
2  
3 Venous blood sampling will be performed between 08:00 and 09:00 hours after the individuals fasted and  
4 abstained from smoking and the consumption of alcohol and caffeinated beverages for the previous 12  
5 hours. Fasting plasma glucose, creatinine, uric acid, serum total cholesterol, HDL-cholesterol and  
6 triglyceride concentrations will be measured using standard enzymatic automated methods. LDL  
7 cholesterol will be estimated by the Friedewald equation when the direct parameter will be not available.  
8 Glycated haemoglobin will be measured with an immune-turbidimetric assay. High sensitive C-reactive  
9 protein levels and fibrinogen concentrations will be determined by immunoturbidimetric assay. Blood  
10 samples will be collected in the health center, and will be analyzed at the University hospital of Salamanca  
11 in external quality assurance programs of the Spanish Society of Clinical Chemistry and Molecular  
12 Pathology.

### 23 ***Anthropometric measurements***

24  
25 Body weight will be determined on two occasions using a homologated electronic scale (Seca 770;  
26 Medical scale and measurement systems, Birmingham, United Kingdom) following due calibration  
27 (precision  $\pm 0.1$  kg), with the patient wearing light clothing and shoeless. These readings will be rounded  
28 to 100 g. Height in turn will be measured with a portable system (Seca 222; Medical scale and  
29 measurement systems, Birmingham, United Kingdom), recording the average of two readings, and with  
30 the patient shoeless in the standing position. The values will be rounded to the closest centimeter. Body  
31 mass index (BMI) will be calculated as weight (kg) divided by height squared ( $m^2$ ). A value of  $> 30$   $kg/m^2$   
32 will be taken to define obesity. Waist circumference will be measured using a flexible graduated measuring  
33 tape with the patient in the standing position without clothing. The upper border of the iliac crests will be  
34 located, and the tape will be wrapped around above this point, parallel to the floor, ensuring that it will be  
35 adjusted without compressing the skin. Adiposity indices, waist-height and waist-hip, will also be  
36 calculated.

### 49 ***Office or clinical blood pressure***

50  
51 Office blood pressure measurement will involve three measurements of systolic blood pressure (SBP) and  
52 diastolic blood pressure (DBP), using the average of the last two, with a validated OMRON model M10-IT  
53 sphygmomanometer (Omron Health Care, Kyoto, Japan), by following the recommendations of the  
54  
55  
56  
57  
58  
59  
60

1  
2  
3 European Society of Hypertension[29]. Pulse pressure will be estimated with the mean values of the  
4  
5 second and third measurements.  
6  
7

### 8 9 ***Pulse wave velocity (PWV) and central (CAIx) and peripheral augmentation index (PAIx)***

10  
11 These parameters will be estimated using the SphygmoCor System (AtCor Medical Pty Ltd., Head Office,  
12  
13 West Ryde, Australia). With the patient sitting and resting his/her arm on a rigid surface, pulse wave  
14  
15 analysis will be performed with a sensor in the radial artery, using mathematical transformation to estimate  
16  
17 the aortic pulse wave. CAIx will be estimated from aortic wave morphology using the following formula:  
18  
19 increase in central pressure $\times$ 100/pulse pressure and it will be adjusted for heart rate at 75 bpm. PAIx is a  
20  
21 measurement taken directly from the late systolic shoulder of the peripheral arterial waveform, and is  
22  
23 defined as the ratio of the difference between the 2<sup>nd</sup> peak and diastolic pressure to the difference  
24  
25 between the 1<sup>st</sup> peak and diastolic pressure[30], it is age-dependent and could be a useful index of  
26  
27 vascular aging [31]. PAIx will be calculated as follows: (Second peak systolic blood pressure [SBP2] -  
28  
29 diastolic blood pressure [DBP])/(first peak SBP - DBP)  $\times$  100 (%) and it will be corrected for heart rate at  
30  
31 75 bpm and it will be reported as PAIx75. Carotid and femoral artery pulse waves will be analyzed, with  
32  
33 the patient in a supine position, using the SphygmoCor System (Vx pulse wave velocity), estimating the  
34  
35 delay as compared to the ECG wave and calculating PWV. Distance measurements will be taken with a  
36  
37 measuring tape from the sternal notch to the carotid and femoral arteries at the sensor location and will be  
38  
39 multiplied by 0.8. Subclinical organ damage of PWV will be defined as a carotid–femoral PWV >10 m/s [28  
40  
41 32].  
42

### 43 44 ***Assessment of vascular structure by carotid intima media thickness (IMT)***

45  
46 Carotid ultrasound to assess C-IMT will be performed by two investigators trained for this purpose before  
47  
48 starting the study. A Sonosite Micromax ultrasound device paired with a 5–10 MHz multi-frequency high-  
49  
50 resolution linear transducer with Sonocal software will be used for performing automatic measurements of  
51  
52 carotid IMT in order to optimize reproducibility. Measurements will be made of the common carotid after  
53  
54 the examination of a 10 mm longitudinal section at a distance of 1 cm from the bifurcation, performing  
55  
56 measurements in the proximal and in the distal wall in the lateral, anterior and posterior projections,  
57  
58 following an axis perpendicular to the artery to discriminate two lines, one for the intima-blood interface  
59  
60

1  
2  
3 and the other for the media-adventitious interface. A total of 6 measurements will be obtained of the right  
4 carotid and other 6 of the left carotid, using average values (average carotid IMT) and maximum values  
5 (maximum carotid IMT) automatically calculated by the software [33]. The measurements will be obtained  
6 with the subject lying down, with the head extended and slightly turned opposite to the examined carotid  
7 artery. The reliability was evaluated before the study began using the intraclass correlation coefficient,  
8 which showed values of 0.974 (95%CI: 0.935 to 0.990) for intra-observer agreement on repeated  
9 measurements in 20 subjects, and 0.897 (95%CI:0.740 to 0.959) for inter-observer agreement. According  
10 to the Bland-Altman analysis, the mean difference for intraobserver agreement (95% limits of agreement)  
11 was 0.022 (95%CI: -0.053 to 0.098) and intra-observer agreement was 0.012 (95%CI: -0.034 to 0.059).  
12 The average IMT will be considered abnormal if it measured > 0.90 mm, or if there will be atherosclerotic  
13 plaques with a diameter of 1.5 mm or a focal increase of 0.5 mm or 50% of the adjacent IMT [28].  
14  
15  
16  
17  
18  
19  
20  
21  
22  
23  
24

#### 25 **Cardio Ankle Vascular Index and Ankle-brachial index**

26  
27 Cardio Ankle Vascular Index (CAVI) and Ankle-brachial index (ABI) will be measured using Vasera device  
28 VS-1500® (Fukuda Denshi). The pulse wave velocity (PWV) will be calculated, as well as Cardio Ankle  
29 Vascular Index (CAVI), which gives a more accurate calculation of the atherosclerosis degree. CAVI  
30 integrates cardiovascular elasticity derived from the aorta to the ankle pulse velocity through an  
31 oscillometric method and it is used as a good measure of vascular stiffness and it doesn't depend on  
32 blood pressure [34]. CAVI values will be automatically calculated by substituting the stiffness parameter  $\beta$   
33 in the following equation to detect the vascular elasticity and the cardio-ankle PWV: Stiffness parameter  $\beta$   
34 =  $2\rho \times 1 / (P_s - P_d) \times \ln (P_s/P_d) \times PWV^2$ , where  $\rho$  is the blood density,  $P_s$  and  $P_d$  are SBP and DBP in  
35 mmHg, and the PWV is measured between the aortic valve and ankle. The average coefficient of the  
36 variation of the CAVI is less than 5%, which is small enough for clinical use and confirm that CAVI has  
37 favorable reproducibility [35]. Cardio Ankle Vascular Index and Ankle-brachial index will be measured at  
38 rest. For the study, the lowest ABI and the highest CAVI and PWV obtained will be considered.  
39  
40  
41  
42  
43  
44  
45  
46  
47  
48  
49  
50

#### 51 **Renal assessment**

52  
53 Kidney damage will be assessed by measuring estimated glomerular filtration rate using the CKD-EPI  
54 (Chronic Kidney Disease Epidemiology Collaboration) [36] equation and proteinuria, as assessed by the  
55 albumin/creatinine ratio following the criteria of the 2013 European Society of Hypertension/European  
56  
57  
58  
59  
60

1  
2  
3 Society of Cardiology Guidelines [28] Subclinical organ damage will be defined as a glomerular filtration  
4 rate below 30–60 ml/min/1.73 m<sup>2</sup> or microalbuminuria (30–300 mg/24 h), or albumin–creatinine ratio (30–  
5 300 mg/g; 3.4–34 mg/mmol) (preferably on morning spot urine). Renal disease will be defined as a  
6 glomerular filtration rate <30 mL/min/1.73 m<sup>2</sup> (BSA), proteinuria (>300 mg/24 h), or albumin/creatinine ratio  
7 > 300 mg/24 h [28].  
8  
9

### 10 11 12 **Cardiac assessment**

13  
14 Electrocardiographic examination will be performed using a General Electric MAC 3.500 ECG System  
15 (Niskayuna, New York, USA) that automatically measures wave voltage and duration and estimates the  
16 criteria of the Cornell voltage-duration product (Cornell VDP) [37]. Electrocardiographic LVH will be  
17 defined as a Sokolow–Lyon index >3.5 mV; RaVL >1.1 mV, Cornell voltage duration product >244 mV\*ms  
18 or RaVL >1.1 mV; [28].  
19  
20  
21  
22  
23  
24

### 25 **Cardiovascular risk assessment**

26  
27 Cardiovascular risk will be estimated using the score of the 2013 European Society of  
28 Hypertension/European Society of Cardiology Guidelines[28] and the risk equation (D'Agostino scale)  
29 based on the Framingham study [38]. Risk factors used include age, sex, total cholesterol, high-density  
30 lipoprotein cholesterol (HDL-C), and systolic blood pressure as quantitative variables, and drug treatment  
31 for hypertension, smoking, and history of diabetes mellitus as dichotomous variables.  
32  
33  
34  
35  
36

### 37 **Retinal vascular evaluation**

38  
39 Using a non-mydratric retinography, TOPCON TRC NW 200, (Topcon Europe B.C., Capelle a/d IJssel, The  
40 Netherlands) in the sitting position, a nurse trained will get nasal and temporal images centered in papilla.  
41 Then using the specific software developed (*Altair*) will be automatically calculated the retinal vessels  
42 thickness, the AVR, the area vascularized and the pattern of branching.  
43  
44  
45  
46

### 47 **Development of *Altair* platform: Automatic image analyzer to assess retinal vessel caliber**

48  
49 The platform, called *Altair* "Automatic image analyzer to assess retinal vessel caliber", makes use of a  
50 methodology divided in different stages that are described below, to determine the characteristics of  
51 interest of the veins and arteries of the retina. This methodology uses artificial Intelligence (AI) techniques  
52 and analytical algorithms to discover retinal parameters of interest.  
53  
54  
55  
56  
57  
58  
59  
60

1  
2  
3 The methodology is separated into two phases: (i) Digitization of the retina, in which the different  
4 measures of the eye image are recognized. Here a data structure is created, which makes it possible to  
5 represent and process the retina. This phase is subdivided into the following steps as discussed below:  
6  
7 load image and eye detection, processing, detection and segmentation. (ii) Measurements, in which we  
8 work with retinas that have been previously identified. This phase includes extraction of knowledge and  
9 manual correction, or expert knowledge, if necessary.

10  
11  
12  
13  
14  
15 **Digitization of the retina:** To perform this phase, the following steps are necessary:

- 16  
17 1. Load image and eye detection: The platform will automatically try to determine which eye (left or right)  
18 is the image, based on the detection of the macula. In this step, if the automatic detection has been  
19 wrong, the supervisor can modify this value by simply clicking on the correct eye.  
20  
21
- 22  
23 2. Processing: In this step, then noise is reduced, the contrast is improved, the blurriness corrected and  
24 the edges are sharpened. Some of these actions can be carried out at the hardware level, which is to  
25 say with the features included with the camera. During the testing, retinography will be performed  
26 using a Topcon TRC NW 200 nonmydriatic retinal camera, obtaining nasal and temporal images  
27 centered on the disk.  
28  
29
- 30  
31 3. Detection limits: In this step, the platform is capable of locating the disk and identifying the center and  
32 edges of the retina (figure 1). The identification of the papilla is vital since it helps as the starting point  
33 for the detection and identification of the different blood vessels. The platform builds a data structure  
34 that identifies each part of the retina based on the matrices of colors representing the images  
35 obtained. In this step, image processing techniques [24 26] will be used to detect intensity based on  
36 the boundaries of the structures.  
37  
38
- 39  
40 4. Segmentation: In order to detect the limits, it became necessary to carry out a process of image  
41 segmentation. Segmentation is the process that divides an image into regions or objects whose pixels  
42 have similar attributes. Each segmented region typically has a physical significance within the image.  
43 It is one of the most important processes in an automated vision system because it makes it possible  
44 to extract the objects from the image for subsequent description and recognition [39-41]. This step  
45 can be considered the heart of the methodology proposed and used in the platform and perform the  
46 following actions:  
47  
48  
49  
50  
51  
52  
53  
54  
55  
56  
57  
58  
59  
60

- 1  
2  
3 a. Identification of vessels. Blood vessels are identified in the image by thresholding  
4 techniques. Their purpose is to remove pixels where the structuring element does not enter,  
5 in this case the blood vessels. The platform offers here a number of useful options for  
6 experts: Threshold vessels, in order to modify the threshold level automatically taken to a  
7 new vessel detection. Recalculate vessels, recalculate the vessels taking as the threshold  
8 established with the previous parameter. Pencil/eraser thickness: Sets thickness to draw or  
9 erase lines / vessels to switch vessels. Connect: Selecting this option and interacting on the  
10 overall image of the retina, the application connects those vessels whose structure has been  
11 divided as they were not detected section.  
12  
13 b. Structure of vessel. At the end of this stage the entire arterio-venous tree is stored in a  
14 structured way, making it possible to know not only if a vessel passes through a point or not,  
15 but through which point each vessel passes, which one is its parent, etc.  
16  
17 c. Cataloging of veins and arteries (Figure 2). In this step the platform detects whether a vessel  
18 is vein or artery, main branch is taken of the vessel. In this step different classifiers based on  
19 IA as decision trees and Bayesian networks [42] are applied.  
20  
21  
22  
23  
24  
25  
26  
27  
28  
29  
30  
31  
32

### 33 Measurements

34  
35 In this second phase, the results obtained are presented. The platform can display the following  
36 measures: thickness of the veins in  $\mu\text{m}$ , artery thickness in  $\mu\text{m}$ , AVR (ratio between the thickness of the  
37 arteries and veins thickness), veins area in square  $\mu\text{m}$ , artery area in square  $\mu\text{m}$ , area of all vessels in  
38 square  $\mu\text{m}$ , radio papilla in millimeters.  
39  
40

41  
42 The platform also generates internally combined parameters by quadrants and circles. These values are  
43 visible when it comes to export CSV files either individually or together with other existing images already  
44 processed database values.  
45  
46  
47

48  
49 Results of its validity analysis must be consistent with the findings from researches focused on both  
50 cardiovascular risk estimation and evaluation of target organ damage. The results obtained during the use  
51 of the platform will be connected and used to extract additional information by using reasoning models  
52 such as case-based reasoning (CBR) [43] [44].  
53  
54  
55  
56  
57  
58  
59  
60



1  
2  
3 As conclusion, the platform is robust to the changes in the appearance of retinal fundus images typically  
4 encountered in clinical environments, and is proposed as a unified platform to connect all the methods  
5 needed to automate all processes of measurement on the retinas.  
6  
7

### 8 **Retinal software validation**

9  
10 To validate the retinal software platform, the following steps will be completed by the evaluators after  
11 previous training in imaging appreciation.  
12

#### 13 **-Evaluation of the reliability or precision**

14  
15 **1. Intra-observer variability:** To evaluate the measurement repeatability, the operator must measure the  
16 same image of an individual on at least two occasions. To this end, an operator will measure 100 images  
17 of a random subsample of 50 patients with a 1-week difference between the two measurements. In this  
18 case, the operator and the analysed images will be the same on both days, and the information from the  
19 previous measurement will be unknown.  
20  
21

22  
23 **2. Inter-observer variability:** To evaluate the reproducibility of the measurement system, a different  
24 operator than who completed the assessment in phase 1 will evaluate the same 100 images previously  
25 analysed. The information from the results obtained in the previous phase will be unknown to this  
26 operator, and both operators will have the same experience in the subject and pertaining to the use of the  
27 software. Furthermore, both operators will receive the same preparatory training.  
28  
29

#### 30 **-Evaluation the validity (accuracy)**

31  
32 **3. To assess the degree of agreement between Altair and the AV Index calculator® software (1),**  
33 **previously validated by us, the evaluation of 100 images will be performed using both tools. In this**  
34 **way, we will be able to demonstrate that the new method, apart from providing the same results, is**  
35 **more objective and faster in elaborating the results.**  
36  
37

38  
39 **4. The measurement validity will be analysed in a total sample of 386 subjects and 772**  
40 **retinographies, in regards to the relationship between the results of the carotid IMT, as a**  
41 **measurement of vascular structure, the PWV, the gold standard measure of arterial stiffness, the**  
42 **CAVI, kidney function, electrocardiographic parameters, and the estimated cardiovascular risk**  
43 **using different scales.**  
44  
45  
46  
47  
48  
49  
50  
51  
52  
53  
54  
55  
56  
57  
58  
59  
60

1  
2  
3 **5. The association between different estimated parameters of the retina with the evolution or onset**  
4 **of new lesions in the target organs will be analysed, as well as any cardiovascular events that**  
5 **occur during the 4-year follow-up of the second phase of this project.**  
6  
7  
8

### 9 **Statistical analysis**

10  
11 The data corresponding to quantitative variables with a normal distribution will be presented with the mean  
12 and standard deviation and with the median and an interquartile range if the distribution is asymmetric,  
13 while the qualitative variables will be presented according to the distribution of the frequencies. Normality  
14 will be evaluated with the Kolmogorov–Smirnov test. The Pearson's Chi-squared test will be used to  
15 analyse associations between the qualitative variables. The mean comparison, in the case of two groups,  
16 will be performed using the Student's t-test for independent samples and, in the case of larger groups, the  
17 ANOVA test. Post-hoc contrasts will be performed with the least significant difference (LSD) method and  
18 an alpha value <0.05. Repeated data will be analysed with the Student's t-test for paired data. The  
19 relationship between quantitative variables will be analysed according to the Pearson's or Spearman's  
20 correlation coefficient, depending on the type of distribution being considered. Finally, a multivariate  
21 analysis with multiple lineal regressions will be performed to analyse the association of the retinal  
22 parameters generated by *Altair* with the vascular structure and function. To contrast the hypothesis, an  
23 alpha risk of 0.05 will be set as the limit of statistical significance. Statistical analysis will be performed  
24 using SPSS/PC+ software version 20.0.  
25  
26  
27  
28  
29  
30  
31  
32  
33  
34  
35  
36  
37  
38

39 For validation of the retinal software, we will evaluate the measurements of artery and vein thickness,  
40 vascularised surfaces, and branching patterns from the three phases of validation, and the intraclass  
41 correlation coefficient (ICC) will be calculated as a comparative method. Using the Bland-Altman method,  
42 the limits of agreement between the measurements of the observers will be evaluated. The kappa  
43 agreement coefficient will be analysed to categorise the variable. This coefficient will allow us to evaluate  
44 the degree of agreement between the two methods. The accordance validity will also be analysed via  
45 correlation and multiple regression analysis, by evaluating the degree of association with other parameters  
46 of vascular structure and function and target organ injury.  
47  
48  
49  
50  
51  
52  
53  
54

### 55 **Project schedule**

1  
2  
3 This project is on a 5-year plan, with the aim of developing and validating the *Altair* software platform  
4 during the first year. Subsequently, a 4-year follow-up study will be performed to evaluate the evolution of  
5 target organ injuries, as well as the cardiovascular risk on the analysed retinal vascularisation parameters,  
6 i.e., the artery and vein thickness, the vascularised surface, and the branching patterns. An exhaustive  
7 evaluation of the subject will be performed at baseline and during the third and fifth years. A short  
8 evaluation will be performed during the second and fourth years.

### 15 **Quality control**

16  
17 In order to ensure data quality, the professionals in charge of assessment retinal images and data  
18 collection will receive specific training. Regular external monitoring will then be performed to verify  
19 adequate application of methods, both in performing the different examinations and collecting the  
20 information.  
21  
22  
23  
24

### 25 **Ethical and legal issues**

26  
27 The study has been approved by the clinical research ethics committee (CEIC) of the healthcare area of  
28 Salamanca ("CEIC of Area de Salud de Salamanca", 29 January, 2014). Subjects will be required to sign  
29 the informed consent prior to inclusion in the study, in accordance with the Declaration of Helsinki [45].  
30  
31 Subjects will be informed of the objectives of the project and of the risks and benefits of the examinations  
32 made. None of the examinations pose life-threatening risks for the type of subjects to be included in the  
33 study. The study includes the obtainment of biological samples; the study subjects therefore will be  
34 informed in detail. The confidentiality of the recruited subjects will be ensured at all times in accordance  
35 with the provisions of current legislation on personal data protection (15/1999 of 13 December, LOPD),  
36 and the conditions contemplated by Act 14/2007 on biomedical research.  
37  
38  
39  
40  
41  
42  
43  
44

### 45 **Discussion**

46  
47 In a previous study performed by our group [20], we identified a positive association between the  
48 cardiovascular risk, estimated with the Framingham scale, and the retinal vessel calibre, mainly the  
49 venous calibre, and this association was maintained in the multivariate analysis. The arterial calibre, which  
50 also demonstrated a positive association, and the AVR, which demonstrated a negative association, seem  
51 to play a less relevant role than the venous calibre in regards to the cardiovascular risk.  
52  
53  
54  
55  
56  
57  
58  
59  
60

1  
2  
3 The positive association between the cardiovascular risk and the venous calibre is in accordance with  
4 several published studies showing an association between the AVR and the coronary heart disease risk  
5 [12 13 21]. For example, McGeecham et al. [21], showed that when including the arterial and venous  
6 thickness, the Framingham model improved coronary event prediction, but only in women. This finding  
7 was repeated in several studies and was recently reported in a meta-analysis [13], which seems to  
8 support the notion that microvascular disease could be more important than coronary heart disease in  
9 women than men [46]. However, these results have been variable, as Wong et al. in the Beaver Dam Eye  
10 study [47] described the lack of an association between the AVR and the cardiovascular morbidity and  
11 mortality in the examined subgroups. In addition, Wang JJ et al.[48] identified an association between  
12 venous calibre and coronary death in men but not in women.

13  
14 It is likely that some of these discrepancies are due to the different tools employed for evaluation of the  
15 retinal vessels, as all of these methods are manual or semiautomatic and, to a greater or lesser degree,  
16 are susceptible to the influence of the observer. The use of only particular information regarding the  
17 vascularisation of the retina may also influence the results. However, the *Altair* software platform resolves  
18 these problems. On the one hand, this platform is practically an automated tool with a low observer  
19 influence. In addition, we expect the inter- and intra-observer variability to be low and, as a result, the  
20 reliability to be significantly elevated. On the other hand, by using additional information on retinal  
21 vascularisation, the vascularised surface, the vascularisation patterns, and the artery and vein thickness,  
22 we expect to improve the validity of the tool and clarify the discrepancies reported in previous studies.

### 23 24 25 26 27 28 29 30 31 32 33 34 35 36 37 38 39 40 41 **Study limitations**

42 Data will be obtained from patients with a cardiovascular risk factor, who satisfy the inclusion criteria, and  
43 who were referred by a family physician to the Research Unit for vascular risk assessment. Thus, this  
44 approach uses a consecutive sampling method with inclusion criteria, i.e., a non-randomised sampling  
45 method. However, the size of the sample may buffer this limitation, and the real clinical conditions may  
46 lead us to a more real situation than that using more restrictive inclusion criteria for the study patients. The  
47 design of the study during the first phase is transversal; as a result, causality relations cannot be derived,  
48 i.e., only the associations among the analysed variables can be performed. Therefore, non-statistically  
49 detected associations between variables may be possible due to the sample size.

**Abbreviations**

ALTAIR: Automatic image analyzer to assess retinal vessel caliber; ABI: Ankle-brachial index; Alx: Augmentation Index; BMI: Body mass index; CAVI: Cardio Ankle Vascular index; CKD-EPI: Chronic Kidney Disease Epidemiology Collaboration; DBP: Diastolic blood pressure; ESH: European Society of Hypertension; IMT: Intima-media thickness; PWV: Pulse Wave Velocity; SBP: Systolic blood pressure.

**Contributors** Conception of the idea for the study: L. Garcia-Ortiz and JM Corchado-Rodríguez. Development of the protocol, organization and funding: L. García-Ortiz, JM. Corchado-Rodríguez, J.I. Recio-Rodríguez, M.Á. Gómez-Marcos, JA Maderuelo, S. Rodríguez-González, JF. de Paz-Santana, and P. Chamoso-Santos. Writing of the manuscript: L. Garcia-Ortiz, JM Corchado-Rodríguez and MA. Gómez-Marcos. All the authors have read the draft critically, to make contributions, and approved the final text.

**Collaborators.** *Members of the Altair group:* Luis García-Ortiz, José I Recio-Rodríguez, Manuel A Gómez-Marcos, José A Maderuelo-Fernández, Sara Rodríguez-González, Juan F de Paz-Santana, Pablo Chamoso-Santos, Miguel Merchan-Cifuentes and Juan M Corchado-Rodríguez. María C Patino-Alonso, Emiliano Rodríguez-Sánchez, Diana Perez Arechaederra, Sara Mora Simón, Ángela de Cabo Laso, Carmela Rodriguez Martín, Luis F Valero Juan, Leticia Gómez-Sánchez, Cristina Agudo-Conde.

**Funding:** The project has been funded by the Institute of Health Carlos III of the Ministry of Economy and Competitiveness (Spain) through the Network for Prevention and Health Promotion in Primary Care (redIAPP, RD12/0005), co-financed with European Union ERDF, the Autonomous Government of Castilla and León (GRS 907/B/14 and intensification of research program) and Vicente y Garcia Corselas Foundation (Call 2013).

**Competing interests** None

**Patient consent** Obtained.

**Ethics approval** The study has been approved by the clinical research ethics committee of the healthcare area of Salamanca.

**Provenance and peer review** Not commissioned; peer reviewed for ethical and funding approval prior to submission.

## REFERENCIAS

1. Hubbard LD, Brothers RJ, King WN, *et al.* Methods for evaluation of retinal microvascular abnormalities associated with hypertension/sclerosis in the Atherosclerosis Risk in Communities Study. *Ophthalmology* 1999;106:2269-80.
2. Ikram MK, de Jong FJ, Vingerling JR, *et al.* Are retinal arteriolar or venular diameters associated with markers for cardiovascular disorders? The Rotterdam Study. *Invest Ophthalmol Vis Sci* 2004;45:2129-34.
3. Nguyen TT, Wang JJ, Sharrett AR, *et al.* Relationship of retinal vascular caliber with diabetes and retinopathy: the Multi-Ethnic Study of Atherosclerosis (MESA). *Diabetes Care* 2008;31:544-9.
4. Pose-Reino A, Gomez-Ulla F, Hayik B, *et al.* Computerized measurement of retinal blood vessel calibre: description, validation and use to determine the influence of ageing and hypertension. *J Hypertens* 2005;23:843-50.
5. Tikellis G, Wang JJ, Tapp R, *et al.* The relationship of retinal vascular calibre to diabetes and retinopathy: the Australian Diabetes, Obesity and Lifestyle (AusDiab) study. *Diabetologia* 2007;50:2263-71.
6. Cheung CY, Ikram MK, Sabanayagam C, *et al.* Retinal microvasculature as a model to study the manifestations of hypertension. *Hypertension* 2012;60:1094-103.
7. Ortega M, Barreira N, Novo J, *et al.* Sirius: a web-based system for retinal image analysis. *Int J Med Inform* 2010;79:722-32.
8. Tanabe Y, Kawasaki R, Wang JJ, *et al.* Retinal arteriolar narrowing predicts 5-year risk of hypertension in Japanese people: the Funagata study. *Microcirculation* 2010;17:94-102.
9. Tikellis G, Arnett DK, Skelton TN, *et al.* Retinal arteriolar narrowing and left ventricular hypertrophy in African Americans. the Atherosclerosis Risk in Communities (ARIC) study. *Am J Hypertens* 2008;21:352-9.
10. Wong TY, Duncan BB, Golden SH, *et al.* Associations between the metabolic syndrome and retinal microvascular signs: the Atherosclerosis Risk In Communities study. *Invest Ophthalmol Vis Sci* 2004;45:2949-54.
11. Yatsuya H, Folsom AR, Wong TY, *et al.* Retinal microvascular abnormalities and risk of lacunar stroke: Atherosclerosis Risk in Communities Study. *Stroke* 2010;41:1349-55.
12. Wong TY, Klein R, Sharrett AR, *et al.* Retinal arteriolar narrowing and risk of coronary heart disease in men and women. The Atherosclerosis Risk in Communities Study. *JAMA* 2002;287:1153-9.
13. McGeechan K, Liew G, Macaskill P, *et al.* Meta-analysis: retinal vessel caliber and risk for coronary heart disease. *Ann Intern Med* 2009;151:404-13.
14. Sabanayagam C, Shankar A, Klein BE, *et al.* Bidirectional association of retinal vessel diameters and estimated GFR decline: the Beaver Dam CKD Study. *Am J Kidney Dis* 2011;57:682-91.
15. Sabanayagam C, Tai ES, Shankar A, *et al.* Retinal arteriolar narrowing increases the likelihood of chronic kidney disease in hypertension. *J Hypertens* 2009;27:2209-17.
16. van Hecke MV, Dekker JM, Nijpels G, *et al.* Are retinal microvascular abnormalities associated with large artery endothelial dysfunction and intima-media thickness? The Hoorn Study. *Clin Sci (Lond)* 2006;110:597-604.
17. Cuspidi C, Meani S, Salerno M, *et al.* Retinal microvascular changes and target organ damage in untreated essential hypertensives. *J Hypertens* 2004;22:2095-102.

- 1
- 2
- 3 18. Masaidi M, Cuspidi C, Giudici V, *et al.* Is retinal arteriolar-venular ratio associated with
- 4 cardiac and extracardiac organ damage in essential hypertension? *J Hypertens*
- 5 2009;27:1277-83.
- 6 19. Torres FS, Fuchs SC, Maestri MK, *et al.* Association between carotid intima-media thickness
- 7 and retinal arteriolar and venular diameter in patients with hypertension: a cross-sectional
- 8 study. *Atherosclerosis* 2013;229:134-8.
- 9 20. García-Ortiz L, Recio-Rodríguez JI, Parra-Sanchez J, *et al.* A new tool to assess retinal vessel
- 10 caliber. Reliability and validity of measures and their relationship with cardiovascular risk.
- 11 *Journal of Hypertension* 2012;30:770-77.
- 12 21. McGeechan K, Liew G, Macaskill P, *et al.* Risk prediction of coronary heart disease based on
- 13 retinal vascular caliber (from the Atherosclerosis Risk In Communities [ARIC] Study). *Am J*
- 14 *Cardiol* 2008;102:58-63.
- 15 22. Masters BR. Fractal analysis of the vascular tree in the human retina. *Annu Rev Biomed Eng*
- 16 2004;6:427-52.
- 17 23. Cheung CY, Ong S, Ikram MK, *et al.* Retinal Vascular Fractal Dimension is Associated with
- 18 Cognitive Dysfunction. *J Stroke Cerebrovasc Dis* 2012.
- 19 24. Chen B, Tosha C, Gorin MB, *et al.* Analysis of autofluorescent retinal images and
- 20 measurement of atrophic lesion growth in Stargardt disease. *Exp Eye Res* 2010;91:143-52.
- 21 25. Sanchez CI, Hornero R, Lopez MI, *et al.* A novel automatic image processing algorithm for
- 22 detection of hard exudates based on retinal image analysis. *Med Eng Phys* 2008;30:350-7.
- 23 26. Heneghan C, Flynn J, O'Keefe M, *et al.* Characterization of changes in blood vessel width
- 24 and tortuosity in retinopathy of prematurity using image analysis. *Med Image Anal*
- 25 2002;6:407-29.
- 26 27. Jago R, Blauth CI, Smith PL, *et al.* Automatic geometrical registration of fluorescein retinal
- 27 angiograms. *Comput Biomed Res* 1990;23:403-9.
- 28 28. Mancia G, Fagard R, Narkiewicz K, *et al.* 2013 ESH/ESC Guidelines for the management of
- 29 arterial hypertension: the Task Force for the management of arterial hypertension of the
- 30 European Society of Hypertension (ESH) and of the European Society of Cardiology (ESC). *J*
- 31 *Hypertens* 2013;31:1281-357.
- 32 29. O'Brien E, Asmar R, Beilin L, *et al.* Practice guidelines of the European Society of
- 33 Hypertension for clinic, ambulatory and self blood pressure measurement. *J Hypertens*
- 34 2005;23:697-701.
- 35 30. Munir S, Guilcher A, Kamallesh T, *et al.* Peripheral augmentation index defines the
- 36 relationship between central and peripheral pulse pressure. *Hypertension* 2008;51:112-8.
- 37 31. Kohara K, Tabara Y, Oshiumi A, *et al.* Radial augmentation index: a useful and easily
- 38 obtainable parameter for vascular aging. *Am J Hypertens* 2005;18:115-145.
- 39 32. Van Bortel LM, Laurent S, Boutouyrie P, *et al.* Expert consensus document on the
- 40 measurement of aortic stiffness in daily practice using carotid-femoral pulse wave velocity.
- 41 *J Hypertens* 2012;30:445-8.
- 42 33. Gomez-Marcos MA, Recio-Rodríguez JI, Patino-Alonso MC, *et al.* Protocol for measuring
- 43 carotid intima-media thickness that best correlates with cardiovascular risk and target
- 44 organ damage. *Am J Hypertens* 2012;25:955-61.
- 45 34. Shirai K, Hiruta N, Song M, *et al.* Cardio-ankle vascular index (CAVI) as a novel indicator of
- 46 arterial stiffness: theory, evidence and perspectives. *J Atheroscler Thromb* 2011;18:924-38.
- 47 35. Shirai K, Utino J, Otsuka K, *et al.* A novel blood pressure-independent arterial wall stiffness
- 48 parameter; cardio-ankle vascular index (CAVI). *J Atheroscler Thromb* 2006;13:101-7.
- 49 36. Levey AS, Stevens LA, Schmid CH, *et al.* A new equation to estimate glomerular filtration
- 50 rate. *Ann Intern Med* 2009;150:604-12.
- 51 37. Okin PM, Roman MJ, Devereux RB, *et al.* Electrocardiographic identification of increased
- 52 left ventricular mass by simple voltage-duration products. *J Am Coll Cardiol* 1995;25:417-
- 53 23.
- 54
- 55
- 56
- 57
- 58
- 59
- 60

- 1
- 2
- 3 38. D'Agostino RB, Sr., Vasan RS, Pencina MJ, *et al.* General cardiovascular risk profile for use in
- 4 primary care: the Framingham Heart Study. *Circulation* 2008;117:743-53.
- 5 39. Goldbaum MH, Katz NP, Nelson MR, *et al.* The discrimination of similarly colored objects in
- 6 computer images of the ocular fundus. *Invest Ophthalmol Vis Sci* 1990;31:617-23.
- 7 40. Kalviainen H, Hirvonen P, Xu L, *et al.* Probabilistic and non-probabilistic Hough transforms.
- 8 *Image Vision Comput* 1995;13 239 -52.
- 9 41. Lee S, Wang Y, Lee E. A computer algorithm for automated detection and quantification of
- 10 microaneurysms and haemorrhages in color retinal images. *SPIE Conference on Image*
- 11 *Perception and Performance* 1999;3663 61-71.
- 12 42. Nielsen T. Bayesian networks and decision graphs. In: Springer FJ-, ed.: FV JENSEN -
- 13 Springer, 2009.
- 14 43. De Paz JF, Rodríguez S, Bajo J, *et al.* CBR System for Diagnosis of Patient: IEEE Computer
- 15 Society Press, 2009:807-12.
- 16 44. Rodríguez S, De Paz JF, Bajo J, *et al.* Applying CBR Sytems to Micro-Array Data
- 17 Classification. Proceedings of IWPACBB 2008: Springer Verlag. Advances in Soft Computing
- 18 Series, 2008.
- 19 45. WMA. World Medical Association Declaration of Helsinki: ethical principles for medical
- 20 research involving human subjects. *JAMA* 2013;310:2191-4.
- 21 46. Wang JJ, Liew G, Wong TY, *et al.* Retinal vascular calibre and the risk of coronary heart
- 22 disease-related death. *Heart* 2006;92:1583-7.
- 23 47. Wong TY, Knudtson MD, Klein R, *et al.* A prospective cohort study of retinal arteriolar
- 24 narrowing and mortality. *Am J Epidemiol* 2004;159:819-25.
- 25 48. Wang JJ, Liew G, Klein R, *et al.* Retinal vessel diameter and cardiovascular mortality: pooled
- 26 data analysis from two older populations. *Eur Heart J* 2007;28:1984-92.
- 27
- 28
- 29
- 30
- 31
- 32
- 33
- 34
- 35
- 36
- 37
- 38
- 39
- 40
- 41
- 42
- 43
- 44
- 45
- 46
- 47
- 48
- 49
- 50
- 51
- 52
- 53
- 54
- 55
- 56
- 57
- 58
- 59
- 60



1  
2  
3  
4  
5  
6  
7  
8  
9  
10  
11  
12  
13  
14  
15  
16  
17  
18  
19  
20  
21  
22  
23  
24  
25  
26  
27  
28  
29  
30  
31  
32  
33  
34  
35  
36  
37  
38  
39  
40  
41  
42  
43  
44  
45  
46  
47  
48  
49  
50  
51  
52  
53  
54  
55  
56  
57  
58  
59  
60

Figure 1. Detection and identification of vessels steps: locating the disk and identifying the center and edges of the retina

Figure 2. Detection and identification of vessels steps: cataloging of veins and arteries

For peer review only

## STROBE Statement—checklist of items that should be included in reports of observational studies

|                              | Item No | Recommendation                                                                                                                                                                                                                                                                                                                                                                                                                                                                                                                                                                                                                                                                                     |
|------------------------------|---------|----------------------------------------------------------------------------------------------------------------------------------------------------------------------------------------------------------------------------------------------------------------------------------------------------------------------------------------------------------------------------------------------------------------------------------------------------------------------------------------------------------------------------------------------------------------------------------------------------------------------------------------------------------------------------------------------------|
| <b>Title and abstract</b>    | 1       | X (a) Indicate the study's design with a commonly used term in the title or the abstract<br>(b) Provide in the abstract an informative and balanced summary of what was done and what was found                                                                                                                                                                                                                                                                                                                                                                                                                                                                                                    |
| <b>Introduction</b>          |         |                                                                                                                                                                                                                                                                                                                                                                                                                                                                                                                                                                                                                                                                                                    |
| Background/rationale         | 2       | X Explain the scientific background and rationale for the investigation being reported                                                                                                                                                                                                                                                                                                                                                                                                                                                                                                                                                                                                             |
| Objectives                   | 3       | X State specific objectives, including any prespecified hypotheses                                                                                                                                                                                                                                                                                                                                                                                                                                                                                                                                                                                                                                 |
| <b>Methods</b>               |         |                                                                                                                                                                                                                                                                                                                                                                                                                                                                                                                                                                                                                                                                                                    |
| Study design                 | 4       | X Present key elements of study design early in the paper                                                                                                                                                                                                                                                                                                                                                                                                                                                                                                                                                                                                                                          |
| Setting                      | 5       | X Describe the setting, locations, and relevant dates, including periods of recruitment, exposure, follow-up, and data collection                                                                                                                                                                                                                                                                                                                                                                                                                                                                                                                                                                  |
| Participants                 | 6       | (a) <i>Cohort study</i> —Give the eligibility criteria, and the sources and methods of selection of participants. Describe methods of follow-up<br><i>Case-control study</i> —Give the eligibility criteria, and the sources and methods of case ascertainment and control selection. Give the rationale for the choice of cases and controls<br>X <i>Cross-sectional study</i> —Give the eligibility criteria, and the sources and methods of selection of participants<br>(b) <i>Cohort study</i> —For matched studies, give matching criteria and number of exposed and unexposed<br><i>Case-control study</i> —For matched studies, give matching criteria and the number of controls per case |
| Variables                    | 7       | X Clearly define all outcomes, exposures, predictors, potential confounders, and effect modifiers. Give diagnostic criteria, if applicable                                                                                                                                                                                                                                                                                                                                                                                                                                                                                                                                                         |
| Data sources/<br>measurement | 8*      | X For each variable of interest, give sources of data and details of methods of assessment (measurement). Describe comparability of assessment methods if there is more than one group                                                                                                                                                                                                                                                                                                                                                                                                                                                                                                             |
| Bias                         | 9       | X Describe any efforts to address potential sources of bias                                                                                                                                                                                                                                                                                                                                                                                                                                                                                                                                                                                                                                        |
| Study size                   | 10      | X Explain how the study size was arrived at                                                                                                                                                                                                                                                                                                                                                                                                                                                                                                                                                                                                                                                        |
| Quantitative variables       | 11      | Explain how quantitative variables were handled in the analyses. If applicable, describe which groupings were chosen and why                                                                                                                                                                                                                                                                                                                                                                                                                                                                                                                                                                       |
| Statistical methods          | 12      | X (a) Describe all statistical methods, including those used to control for confounding<br>(b) Describe any methods used to examine subgroups and interactions<br>(c) Explain how missing data were addressed<br>(d) <i>Cohort study</i> —If applicable, explain how loss to follow-up was addressed<br><i>Case-control study</i> —If applicable, explain how matching of cases and controls was addressed<br><i>Cross-sectional study</i> —If applicable, describe analytical methods taking account of sampling strategy<br>(e) Describe any sensitivity analyses                                                                                                                                |

Continued on next page

**Results (not applicable)**

|                  |     |                                                                                                                                                                                                                                                                                                                                                                                                               |
|------------------|-----|---------------------------------------------------------------------------------------------------------------------------------------------------------------------------------------------------------------------------------------------------------------------------------------------------------------------------------------------------------------------------------------------------------------|
| Participants     | 13* | (a) Report numbers of individuals at each stage of study—eg numbers potentially eligible, examined for eligibility, confirmed eligible, included in the study, completing follow-up, and analysed<br>(b) Give reasons for non-participation at each stage<br>(c) Consider use of a flow diagram                                                                                                               |
| Descriptive data | 14* | (a) Give characteristics of study participants (eg demographic, clinical, social) and information on exposures and potential confounders<br>(b) Indicate number of participants with missing data for each variable of interest<br>(c) <i>Cohort study</i> —Summarise follow-up time (eg, average and total amount)                                                                                           |
| Outcome data     | 15* | <i>Cohort study</i> —Report numbers of outcome events or summary measures over time<br><i>Case-control study</i> —Report numbers in each exposure category, or summary measures of exposure<br><i>Cross-sectional study</i> —Report numbers of outcome events or summary measures                                                                                                                             |
| Main results     | 16  | (a) Give unadjusted estimates and, if applicable, confounder-adjusted estimates and their precision (eg, 95% confidence interval). Make clear which confounders were adjusted for and why they were included<br>(b) Report category boundaries when continuous variables were categorized<br>(c) If relevant, consider translating estimates of relative risk into absolute risk for a meaningful time period |
| Other analyses   | 17  | Report other analyses done—eg analyses of subgroups and interactions, and sensitivity analyses                                                                                                                                                                                                                                                                                                                |

**Discussion (not applicable)**

|                  |    |                                                                                                                                                                            |
|------------------|----|----------------------------------------------------------------------------------------------------------------------------------------------------------------------------|
| Key results      | 18 | Summarise key results with reference to study objectives                                                                                                                   |
| Limitations      | 19 | Discuss limitations of the study, taking into account sources of potential bias or imprecision. Discuss both direction and magnitude of any potential bias                 |
| Interpretation   | 20 | Give a cautious overall interpretation of results considering objectives, limitations, multiplicity of analyses, results from similar studies, and other relevant evidence |
| Generalisability | 21 | Discuss the generalisability (external validity) of the study results                                                                                                      |

**Other information**

|         |    |                                                                                                                                                               |
|---------|----|---------------------------------------------------------------------------------------------------------------------------------------------------------------|
| Funding | 22 | Give the source of funding and the role of the funders for the present study and, if applicable, for the original study on which the present article is based |
|---------|----|---------------------------------------------------------------------------------------------------------------------------------------------------------------|

\*Give information separately for cases and controls in case-control studies and, if applicable, for exposed and unexposed groups in cohort and cross-sectional studies.

**Note:** An Explanation and Elaboration article discusses each checklist item and gives methodological background and published examples of transparent reporting. The STROBE checklist is best used in conjunction with this article (freely available on the Web sites of PLoS Medicine at <http://www.plosmedicine.org/>, Annals of Internal Medicine at <http://www.annals.org/>, and Epidemiology at <http://www.epidem.com/>). Information on the STROBE Initiative is available at [www.strobe-statement.org](http://www.strobe-statement.org).
